# Supplementary material for: High-quality assembly of the Chinese white truffle genome and recalibrated divergence time estimate provide insight into the evolutionary dynamics of Tuberaceae
Source: HighWire-hosted journal article supplement (doi:10.1101/gr.280368.124), 2025-08-21
Supplement: Supplemental_Table_S1.xlsx [file Supplemental_Table_S1.xlsx]

## Sheet: Foglio1
Supplemental Table S1: Statistics of assembly and annotation of the T. panzhihuanense genome. Genome size was estimated with Genomescope and a kmer size of 21. QV scores = log-scaled probability of error for the consensus base calls as estimated by Merqury; BUSCO scores were obtained using the Ascomycota odb10 as reference gene set.
Assembly statistics
Estimated genome size	109 Mb
Assembly size	119 Mb
Contig N50	7.3 Mb
QV score	57.72
GC content	46.37%
Genomic BUSCO scores	C:96.4%[S:95.6%,D:0.8%],F:1.5%,M:2.1%,n:758
Number of annotated genes	8701
Proteome BUSCO scores	C:97.1%[S:96.4%,D:0.7%],F:1.3%,M:1.6%,n:758
Gene density	00:12:00
Repetitive content	65.55%
Mean gene length	1603
Mean number of exons per gene	3.5
Mean exon length	403
Mean number of introns per gene	2
Mean intron length	81
