# Supplementary material for: High-quality assembly of the Chinese white truffle genome and recalibrated divergence time estimate provide insight into the evolutionary dynamics of Tuberaceae
Source: HighWire-hosted journal article supplement (doi:10.1101/gr.280368.124), 2025-08-21
Supplement: Supplemental_Table_S2.xlsx [file Supplemental_Table_S2.xlsx]

## Sheet: Foglio1
Supplemental Table S2: Carbohydrate-Active enzymes annotation as obtained from dbCAN3. Only annotations supported by at least two tools among the three available (HMMER, dbCAN_sub, DIAMOND) were kept.
Gene ID	EC#	HMMER	dbCAN_sub	DIAMOND	#ofTools
FUN_000007-T1	3.2.1.99	GH43_6(30-321)	GH43_e141	GH43_6	3
FUN_000013-T1	3.2.1.21	GH3(50-252)	GH3_e116	GH3	3
FUN_000020-T1	3.1.3.12	GT20(55-607)	GT20_e19	GT20	3
FUN_000032-T1	-	AA11(14-186)	AA11_e8	N	2
FUN_000103-T1	2.4.1.15	GT20(3-468)	GT20_e0	GT20	3
FUN_000116-T1	2.4.1.-	GT24(1220-1467)	GT24_e1	GT24	3
FUN_000136-T1	3.2.1.21|3.2.1.45|3.2.1.104	GH5_12(14-545)	GH5_e145	GH5_12	3
FUN_000167-T1	3.2.1.14	GH18(4-353)	GH18_e20	CBM50+GH18	3
FUN_000177-T1	3.2.1.113	GH47(198-736)	GH47_e5	GH47	3
FUN_000178-T1	4.2.2.10	PL1_4(112-300)	PL1_e33	PL1_4	3
FUN_000184-T1	2.4.1.18	GH13_8(250-543)	CBM48_e32+GH13_e20	CBM48+GH13_8	3
FUN_000238-T1	-	GH17(56-296)	GH17_e15	N	2
FUN_000240-T1	2.4.1.173	GT1(932-1322)	GT1_e24	GT1	3
FUN_000245-T1	2.4.1.-	GH72(23-328)+CBM43(379-467)	GH72_e5+CBM43_e30	CBM43+GH72	3
FUN_000246-T1	2.4.1.34	GT48(868-1649)	GT48_e0	GT48	3
FUN_000387-T1	3.2.1.21	GH3(89-299)	GH3_e180	GH3	3
FUN_000442-T1	1.1.3.-	AA7(67-502)	AA7_e0	N	2
FUN_000451-T1	3.2.1.58	GH5_9(280-602)	GH5_e261	GH5_9	3
FUN_000688-T1	-	GH13_32(343-572)	CBM21_e21+GH13_e236	CBM21+GH13	3
FUN_000690-T1	1.14.99.54|1.14.99.56	AA9(5-233)	AA9_e13	N	2
FUN_000811-T1	2.4.1.25|3.2.1.33	GH13_25(1068-1512)	GH13_e153+GH133_e0	GH13_25+GH133	3
FUN_000824-T1	1.1.3.13	AA3_3(6-599)	AA3_e3	AA3_3	3
FUN_000871-T1	2.4.1.256	GT59(26-520)	GT59_e3	N	2
FUN_001023-T1	-	AA11(23-204)	AA11_e8	N	2
FUN_001024-T1	3.2.1.1	GH13_1(56-343)	GH13_e206	CBM20+GH13_1	3
FUN_001066-T1	-	GH131(21-289)	GH131_e4	N	2
FUN_001076-T1	1.10.3.2	AA1_2(41-375)	AA1_e26	AA1_2	3
FUN_001136-T1	-	CE12(27-243)	CE12_e34	N	2
FUN_001139-T1	3.2.1.1|3.2.1.116|2.4.1.-	GH13_5(25-367)	GH13_e173	GH13_5	3
FUN_001157-T1	-	AA11(20-197)	AA11_e8	N	2
FUN_001174-T1	3.2.1.101	GH76(1-316)	GH76_e8	GH76	3
FUN_001190-T1	-	GH152(43-268)	GH152_e13	N	2
FUN_001241-T1	3.2.1.3	GH15(81-510)	GH15_e31	GH15	3
FUN_001275-T1	2.4.1.258	GT58(26-385)	GT58_e1	GT58	3
FUN_001299-T1	2.4.1.131|2.4.1.-	GT15(91-361)	GT15_e0	GT15	3
FUN_001314-T1	2.4.1.-	GH72(17-328)	GH72_e9	GH72	3
FUN_001328-T1	-	GH17(36-306)	GH17_e6	N	2
FUN_001361-T1	3.2.1.25	GH2(6-706)	GH2_e138	GH2	3
FUN_001435-T1	-	CE12(32-223)	CE12_e61	N	2
FUN_001479-T1	2.4.1.173|2.4.1.-	GT1(284-606)	GT1_e153	GT1	3
FUN_001496-T1	-	AA11(22-210)	AA11_e8	N	2
FUN_001532-T1	3.2.1.96	GH18(15-234)	GH18_e169	N	2
FUN_001536-T1	1.10.3.2|1.10.3.-	AA1_3(67-381)	AA1_e46	AA1_3	3
FUN_001554-T1	3.2.1.4	GH5_5(88-368)	GH5_e137	CBM1+GH5_5	3
FUN_001565-T1	1.14.99.54|1.14.99.56	AA9(7-222)	AA9_e46	N	2
FUN_001608-T1	2.4.1.131|2.4.1.-	GT15(93-353)	GT15_e0	N	2
FUN_001616-T1	-	AA3_2(13-597)	AA3_e21	AA3_2	3
FUN_001632-T1	1.1.3.-	AA7(131-336)	AA7_e0	N	2
FUN_001642-T1	3.2.1.58|3.2.1.21|3.2.1.75	GH5_9(93-391)	GH5_e297	GH5_9	3
FUN_001645-T1	-	PL1(63-230)	PL1_e63	N	2
FUN_001736-T1	2.4.1.265|2.4.1.-	GT57(5-373)	GT57_e1	GT57	3
FUN_001788-T1	-	AA3_2(37-604)	AA3_e48	AA3_2	3
FUN_001790-T1	N	GH63(460-912)	N	GH0	2
FUN_001799-T1	2.4.1.83	GT2(15-185)	GT2	GT2	3
FUN_001880-T1	-	GT34(12-224)	GT34_e9	N	2
FUN_001886-T1	-	GH16_2(270-593)	GH16_e146	GH16_2	3
FUN_001907-T1	-	AA5_1(333-847)	AA5_e6	AA5+CBM18	3
FUN_001948-T1	-	AA11(26-231)	AA11_e8	N	2
FUN_001951-T1	1.1.3.-	AA7(121-312)	AA7_e0	N	2
FUN_002005-T1	2.4.1.186	GT8(4-216)	GT8_e149	GT8	3
FUN_002137-T1	4.2.2.13	GH31_8(47-618)	GH31_e21	GH31	3
FUN_002162-T1	3.2.1.101	GH76(32-421)	GH76_e8	GH76	3
FUN_002203-T1	-	GH18(24-290)	GH18_e124	GH18	3
FUN_002207-T1	1.6.5.6	AA6(4-198)	AA6_e0	N	2
FUN_002240-T1	-	GH55_2(94-828)	GH55_e2	GH55	3
FUN_002399-T1	-	GH20(186-526)	GH20_e43	GH20	3
FUN_002428-T1	2.4.1.16	GT2(662-1184)	GT2	GT2	3
FUN_002437-T1	-	AA11(19-205)	AA11_e8	N	2
FUN_002438-T1	3.2.1.26	GH32(52-370)	GH32_e58	GH32	3
FUN_002453-T1	3.2.1.4|3.2.1.151	GH12(104-238)	GH12_e34	N	2
FUN_002457-T1	3.5.1.41	CE4(115-240)	CE4_e46	N	2
FUN_002597-T1	2.4.1.109	GT39(66-304)	GT39_e30	GT39	3
FUN_002720-T1	-	GH132(96-378)	GH132_e0	N	2
FUN_002805-T1	2.4.1.-|2.4.1.257	GT62(58-318)	GT62_e0	GT62	3
FUN_002807-T1	-	GT8(9-266)	GT8_e176	GT8	3
FUN_002843-T1	2.4.99.18	GT66(18-666)	GT66_e1	GT66	3
FUN_002885-T1	-	AA3_2(35-632)	AA3_e48	AA3_2	3
FUN_002909-T1	1.10.3.2|1.10.3.-	AA1_3(95-404)	AA1_e46	AA1_3	3
FUN_002924-T1	-	AA2(111-363)	AA2_e1	AA2	3
FUN_002957-T1	2.4.1.15	GT20(140-592)	GT20_e24	GT20	3
FUN_003032-T1	3.2.1.14	GH18(70-293)	GH18_e414	N	2
FUN_003177-T1	3.2.1.113	GH47(43-492)	GH47_e16	GH47	3
FUN_003310-T1	2.4.1.142|2.4.1.-	GT33(1-395)	GT33_e1	GT33	3
FUN_003316-T1	2.4.1.198	GT4(194-335)	GT4_e954	GT4	3
FUN_003338-T1	-	CE8(31-309)	CE8_e79	N	2
FUN_003360-T1	-	AA1(109-572)	AA1_e22	AA1	3
FUN_003379-T1	-	GT22(10-415)	GT22_e27	GT22	3
FUN_003437-T1	-	GH125(194-609)	GH125_e2	GH125	3
FUN_003464-T1	-	GT62(80-343)	GT62_e5	GT62	3
FUN_003496-T1	-	GT76(8-402)	GT76_e8	N	2
FUN_003510-T1	-	GH16_22(90-315)	GH16_e122	N	2
FUN_003521-T1	3.2.1.20	GH31_1(294-842)	GH31_e82	GH31	3
FUN_003576-T1	-	AA9(6-215)	AA9_e11	N	2
FUN_003599-T1	2.4.1.-	GT50(135-404)	GT50_e0	GT50	3
FUN_003601-T1	2.4.1.257|2.4.1.132	GT4(212-372)	GT4_e2823	GT4	3
FUN_003651-T1	2.4.1.109	GT39(85-330)	GT39_e9	GT39	3
FUN_003686-T1	2.4.1.-	GH72(24-323)	GH72_e0	GH72	3
FUN_003822-T1	N	GT2(472-649)	N	GT0	2
FUN_003910-T1	3.5.1.41	CE4(402-528)	CE4_e46	N	2
FUN_003921-T1	-	CE4(192-302)	CE4_e257	N	2
FUN_003932-T1	1.1.3.-	AA7(37-486)	AA7_e0	N	2
FUN_004066-T1	-	GH76(33-311)	GH76_e5	N	2
FUN_004114-T1	-	GH24(155-287)	GH24_e64	N	2
FUN_004157-T1	3.2.1.28|-	GH65(396-755)	GH65_e25+CBM32_e187	GH65	3
FUN_004222-T1	3.5.1.41	CE4(140-268)	CE4_e46	N	2
FUN_004250-T1	3.2.1.171	GH28(66-388)	GH28_e27	GH28	3
FUN_004303-T1	-	CBM21(309-415)	CBM21_e9	CBM21	3
FUN_004382-T1	-	CE5(143-315)	CE5_e26	N	2
FUN_004466-T1	5.4.99.11|3.2.1.20|3.2.1.10|3.2.1.-|3.2.1.70	GH13_40(44-406)	GH13_e122	GH13_40	3
FUN_004513-T1	4.2.2.13	GH31_8(321-896)	GH31_e21	GH31_8	3
FUN_004517-T1	-	GT69(171-278)+GT69(334-464)	GT69_e6+GT69_e6	N	2
FUN_004540-T1	1.14.99.54|1.14.99.56	AA9(10-222)	AA9_e34	N	2
FUN_004568-T1	1.14.99.-	AA14(17-256)	AA14_e1	N	2
FUN_004591-T1	3.2.1.21	GH3(91-297)	GH3_e180	GH3	3
FUN_004686-T1	2.4.1.259|2.4.1.261	GT22(54-474)	GT22_e1	GT22	3
FUN_004751-T1	-	AA11(40-205)	AA11_e8	N	2
FUN_004800-T1	-	GH16_22(66-269)	GH16_e122	N	2
FUN_004916-T1	3.2.1.40	GH78(288-699)	GH78_e78	GH78	3
FUN_004926-T1	3.2.1.25	GH2(2-701)	GH2_e138	GH2	3
FUN_004942-T1	-	AA7(166-340)	AA4_e1	GT31	3
FUN_005026-T1	2.4.1.16	GT2(401-563)	GT2+GT2	GT2	3
FUN_005094-T1	3.2.1.113	GH47(102-513)	GH47_e16	AA9+GH47	3
FUN_005363-T1	2.4.1.267	GT57(58-511)	GT57_e0	GT57	3
FUN_005400-T1	2.4.1.109	GT39(63-304)	GT39_e12	GT39	3
FUN_005547-T1	-	GT34(157-422)	GT34_e13	GT34	3
FUN_005561-T1	2.4.1.131|2.4.1.-	GT15(104-378)	GT15_e0	GT15	3
FUN_005643-T1	2.4.1.183|2.4.1.-	GH13_22(115-508)+GH13_22(1180-1642)	GH13_e196+GT5_e25	GH13_22+GT5	3
FUN_005776-T1	3.2.1.113	GH47(180-661)	GH47_e17	GH47	3
FUN_005784-T1	-	AA12(39-407)	AA12_e5	N	2
FUN_005825-T1	-	CE4(44-171)	CE4_e161	N	2
FUN_005827-T1	1.1.3.-	AA7(11-426)	AA7_e0	N	2
FUN_005830-T1	1.1.3.-	AA7(119-543)	AA7_e0	N	2
FUN_005833-T1	3.2.1.132	GH75(17-236)	GH75_e6	N	2
FUN_005851-T1	1.1.3.-	AA7(58-294)	AA7_e5	AA7+CBM18	3
FUN_005858-T1	3.2.1.21	GH3(37-251)	GH3_e116	GH3	3
FUN_005865-T1	1.1.3.-	AA7(30-208)	AA7_e0	N	2
FUN_005866-T1	-	CE4(646-760)	CE4_e190	N	2
FUN_005897-T1	2.4.1.16	GT2(205-374)	GT2+GT2	GT2	3
FUN_006027-T1	3.2.1.24	GH38(286-543)	GH38_e20	GH38	3
FUN_006049-T1	3.5.1.41	CE4(167-294)	CE4_e46	N	2
FUN_006096-T1	2.4.1.-	GT22(5-402)	GT22_e21	GT22	3
FUN_006220-T1	3.2.1.52	GH3(105-334)	GH3_e28	GH3	3
FUN_006256-T1	2.4.1.-	GT32(74-156)	GT32_e52	GT32	3
FUN_006292-T1	3.2.1.106|3.2.1.-	GH63(603-817)	GH63_e12	GH63	3
FUN_006342-T1	3.2.1.58	GH55_2(64-807)	GH55_e8	GH55	3
FUN_006351-T1	1.14.99.53	AA11(43-229)	AA11_e7	N	2
FUN_006388-T1	2.4.1.11	GT3(18-654)	GT3_e0	GT3	3
FUN_006391-T1	2.4.1.131|2.4.1.-	GT15(77-354)	GT15_e0	GT15	3
FUN_006426-T1	-	GH1(99-573)	GH1_e82	GH1	3
FUN_006434-T1	3.2.1.20|3.2.1.84	GH31_1(355-803)	GH31_e39	GH31	3
FUN_006493-T1	2.4.1.80	GT21(78-380)	GT21_e38	GT21	3
FUN_006585-T1	1.14.99.53	AA11(40-229)	AA11_e7	N	2
FUN_006597-T1	1.1.3.-	AA7(56-251)	AA7_e4	N	2
FUN_006638-T1	2.4.1.16	GT2(260-551)	GT2	GT2	3
FUN_006710-T1	2.4.1.1	GT35(154-860)	GT35_e0	GT35	3
FUN_006719-T1	-	GH16_2(121-309)	GH16_e146	N	2
FUN_006782-T1	-	GT22(19-439)	GT22_e3	GT22	3
FUN_006829-T1	-	GH128(42-257)	GH128_e8	N	2
FUN_006836-T1	3.2.1.39	GH81(38-727)	GH81_e0	GH81	3
FUN_006854-T1	2.4.1.16	GT2(1020-1527)	GT2	GT2	3
FUN_006855-T1	2.4.1.16	GT2(1203-1710)	GT2	GT2	3
FUN_007005-T1	-	AA3_2(27-629)	AA3_e52	N	2
FUN_007017-T1	-	AA11(22-189)	AA11_e8	N	2
FUN_007023-T1	3.2.1.-|2.4.1.-	GH17(449-708)	GH17_e67	GH17	3
FUN_007043-T1	-	GT62(98-358)	GT62_e2	GT62	3
FUN_007047-T1	2.4.1.-	GH72(19-325)	GH72_e0	GH72	3
FUN_007093-T1	-	PL4_1(8-394)	PL4_e6	PL4_1	3
FUN_007137-T1	1.1.3.-	AA7(113-518)	AA7_e0	N	2
FUN_007144-T1	-	GT2(87-286)	GT2	N	2
FUN_007191-T1	2.4.1.257	GT32(120-201)	GT32_e68	GT32	3
FUN_007243-T1	2.4.1.131	GT4(281-433)	GT4_e1364	GT4	3
FUN_007246-T1	2.4.1.231	GT4(465-635)	GT4_e3141	GT4	3
FUN_007313-T1	3.2.1.39	GH81(1-658)	GH81_e0	GH81	3
FUN_007355-T1	-	GH16_23(90-279)	GH16_e100	N	2
FUN_007496-T1	-	GT15(113-416)	GT15_e5	GT15	3
FUN_007549-T1	-	GT90(345-625)	GT90_e14	GT90	3
FUN_007716-T1	-	CE4(79-203)	CE4_e66	N	2
FUN_007719-T1	-	GH92(329-843)	GH92_e32	GH92	3
FUN_007808-T1	3.2.1.15	GH28(37-359)	GH28_e75	GH28	3
FUN_007968-T1	3.2.1.96	GH85(69-360)	GH85_e3	N	2
FUN_008035-T1	-	GH47(43-593)	GH47_e19	GH47	3
FUN_008084-T1	-	GH76(115-400)	GH76_e10	GH0	3
FUN_008094-T1	-	GH16_19(107-277)	GH16_e15	CBM18+GH16_19	3
FUN_008103-T1	1.14.99.53	AA11(20-231)	AA11_e7	N	2
FUN_008149-T1	2.4.1.-	GT69(303-556)	GT69_e1	GT69	3
FUN_008241-T1	-	CE12(26-242)	CE12_e34	N	2
FUN_008254-T1	2.4.1.173|2.4.1.-	GT1(227-575)	GT1_e153	GT1	3
FUN_008318-T1	2.4.1.16	GT2(257-421)+GT2(399-589)	GT2+GT2	GT2	3
FUN_008337-T1	2.4.1.16	GT2(222-390)	GT2+GT2	GT2	3
FUN_008575-T1	3.2.1.101	GH76(1-268)	GH76_e44	GH76	3
FUN_008596-T1	3.2.1.39	GH16_4(129-446)	GH16_e102	GH16_4	3
FUN_008597-T1	N	GT2(496-701)	N	GT0	2
FUN_008604-T1	3.2.1.20|3.2.1.84	GH31_1(251-766)	GH31_e7	GH31	3
FUN_008651-T1	1.1.3.-	AA7(43-245)	AA7_e4	N	2
FUN_008705-T1	-	GH16_18(69-223)	GH16_e274	N	2
FUN_008779-T1	3.2.1.58	GH5_9(274-569)	GH5_e261	GH5_9	3
FUN_008780-T1	3.2.1.58	GH5_9(128-254)	GH5_e261	N	2
FUN_008789-T1	3.2.1.52	GH20(228-572)	GH20_e10	GH20	3
FUN_008820-T1	1.10.3.2|1.10.3.-	AA1_3(3-247)	AA1_e46	AA1_3	3
FUN_008860-T1	3.2.1.40|3.1.1.73	CBM67(130-276)+GH78(302-823)	CBM67_e28+GH78_e80	GH78	3
FUN_003768-T1	-	N	GT41_e74	GT41	2
FUN_007846-T1	-	N	GH36_e13	GH36	2
