# Supplementary material for: High-quality assembly of the Chinese white truffle genome and recalibrated divergence time estimate provide insight into the evolutionary dynamics of Tuberaceae
Source: HighWire-hosted journal article supplement (doi:10.1101/gr.280368.124), 2025-08-21
Supplement: Supplemental_Table_S3.xlsx [file Supplemental_Table_S3.xlsx]

## Sheet: Foglio1
Supplemental Table S3: Genomic coordinates of TE hotspots and TE coldspots in BED format.
Contig	Start	End	Type
ctg_1	0	50000	TE hotspot
ctg_1	150000	165000	TE hotspot
ctg_1	240000	300000	TE hotspot
ctg_1	400000	535000	TE hotspot
ctg_1	580000	705000	TE hotspot
ctg_1	940000	980000	TE hotspot
ctg_1	1115000	1195000	TE hotspot
ctg_1	1265000	1305000	TE hotspot
ctg_1	1600000	1655000	TE hotspot
ctg_1	2285000	2380000	TE hotspot
ctg_1	2610000	2615000	TE hotspot
ctg_1	2680000	2700000	TE hotspot
ctg_1	2740000	2800000	TE hotspot
ctg_1	2975000	2990000	TE hotspot
ctg_1	3090000	3245000	TE hotspot
ctg_1	3275000	3330000	TE hotspot
ctg_1	3400000	3415000	TE hotspot
ctg_1	3530000	3605000	TE hotspot
ctg_1	3805000	4205000	TE hotspot
ctg_1	4240000	4320000	TE hotspot
ctg_1	4345000	4370000	TE hotspot
ctg_1	4490000	4570000	TE hotspot
ctg_1	4615000	4745000	TE hotspot
ctg_1	4795000	4895000	TE hotspot
ctg_1	4975000	5050000	TE hotspot
ctg_1	5090000	5445000	TE hotspot
ctg_1	5495000	5615000	TE hotspot
ctg_1	5655000	5730000	TE hotspot
ctg_1	5755000	5860000	TE hotspot
ctg_1	5925000	5930000	TE hotspot
ctg_1	5950000	6545000	TE hotspot
ctg_1	6585000	6635000	TE hotspot
ctg_1	6750000	6755000	TE hotspot
ctg_1	6780000	6815000	TE hotspot
ctg_1	6865000	6895000	TE hotspot
ctg_1	6915000	6955000	TE hotspot
ctg_1	7065000	7090000	TE hotspot
ctg_1	7125000	7520000	TE hotspot
ctg_1	7605000	7650000	TE hotspot
ctg_1	7670000	7680000	TE hotspot
ctg_1	7735000	7750000	TE hotspot
ctg_1	7790000	8435000	TE hotspot
ctg_1	8500000	8645000	TE hotspot
ctg_1	8725000	8860000	TE hotspot
ctg_1	8885000	8950000	TE hotspot
ctg_1	9015000	9540000	TE hotspot
ctg_1	9560000	10030000	TE hotspot
ctg_2	0	15000	TE hotspot
ctg_2	75000	120000	TE hotspot
ctg_2	155000	305000	TE hotspot
ctg_2	345000	365000	TE hotspot
ctg_2	415000	565000	TE hotspot
ctg_2	700000	930000	TE hotspot
ctg_2	1005000	1070000	TE hotspot
ctg_2	1170000	1205000	TE hotspot
ctg_2	1230000	1265000	TE hotspot
ctg_2	1305000	1455000	TE hotspot
ctg_2	1530000	1575000	TE hotspot
ctg_2	1600000	1685000	TE hotspot
ctg_2	1725000	1745000	TE hotspot
ctg_2	1810000	2080000	TE hotspot
ctg_2	2115000	2180000	TE hotspot
ctg_2	2235000	2455000	TE hotspot
ctg_2	2500000	2555000	TE hotspot
ctg_2	2605000	2720000	TE hotspot
ctg_2	2875000	2905000	TE hotspot
ctg_2	3040000	3075000	TE hotspot
ctg_2	3160000	3210000	TE hotspot
ctg_2	3265000	3505000	TE hotspot
ctg_2	3580000	3630000	TE hotspot
ctg_2	3695000	3760000	TE hotspot
ctg_2	3855000	4030000	TE hotspot
ctg_2	4095000	4255000	TE hotspot
ctg_2	4335000	4365000	TE hotspot
ctg_2	4400000	4430000	TE hotspot
ctg_2	4490000	4605000	TE hotspot
ctg_2	4810000	4820000	TE hotspot
ctg_2	4885000	4910000	TE hotspot
ctg_2	5015000	5025000	TE hotspot
ctg_2	5105000	5180000	TE hotspot
ctg_2	5445000	5460000	TE hotspot
ctg_2	5785000	5915000	TE hotspot
ctg_2	5955000	5970000	TE hotspot
ctg_2	6195000	6370000	TE hotspot
ctg_2	6450000	6565000	TE hotspot
ctg_2	6615000	6710000	TE hotspot
ctg_2	6775000	6885000	TE hotspot
ctg_2	6915000	6925000	TE hotspot
ctg_2	7215000	7220000	TE hotspot
ctg_2	7290000	7340000	TE hotspot
ctg_2	7380000	7550000	TE hotspot
ctg_2	7590000	7715000	TE hotspot
ctg_2	7750000	7850000	TE hotspot
ctg_2	7870000	8005000	TE hotspot
ctg_2	8115000	8175000	TE hotspot
ctg_2	8265000	8290000	TE hotspot
ctg_2	8345000	8510000	TE hotspot
ctg_2	8695000	8715000	TE hotspot
ctg_2	8905000	9000000	TE hotspot
ctg_2	9145000	9200000	TE hotspot
ctg_2	9245000	9380000	TE hotspot
ctg_2	9450000	9525000	TE hotspot
ctg_2	9570000	9590000	TE hotspot
ctg_3	30000	40000	TE hotspot
ctg_3	195000	305000	TE hotspot
ctg_3	340000	450000	TE hotspot
ctg_3	470000	565000	TE hotspot
ctg_3	650000	660000	TE hotspot
ctg_3	920000	935000	TE hotspot
ctg_3	1030000	1035000	TE hotspot
ctg_3	1070000	1110000	TE hotspot
ctg_3	1175000	1190000	TE hotspot
ctg_3	1220000	1235000	TE hotspot
ctg_3	1355000	1395000	TE hotspot
ctg_3	1430000	1450000	TE hotspot
ctg_3	1510000	1555000	TE hotspot
ctg_3	1690000	1720000	TE hotspot
ctg_3	1770000	1775000	TE hotspot
ctg_3	1810000	1865000	TE hotspot
ctg_3	1900000	1945000	TE hotspot
ctg_3	2055000	2155000	TE hotspot
ctg_3	2285000	2305000	TE hotspot
ctg_3	2345000	2430000	TE hotspot
ctg_3	2480000	2580000	TE hotspot
ctg_3	2635000	2670000	TE hotspot
ctg_3	2695000	2815000	TE hotspot
ctg_3	2900000	2920000	TE hotspot
ctg_3	2960000	2970000	TE hotspot
ctg_3	3020000	3025000	TE hotspot
ctg_3	3110000	3155000	TE hotspot
ctg_3	3355000	3360000	TE hotspot
ctg_3	3445000	3565000	TE hotspot
ctg_3	3605000	3625000	TE hotspot
ctg_3	3670000	3700000	TE hotspot
ctg_3	3730000	3795000	TE hotspot
ctg_3	3850000	3980000	TE hotspot
ctg_3	4010000	4320000	TE hotspot
ctg_3	4375000	4585000	TE hotspot
ctg_3	4615000	4860000	TE hotspot
ctg_3	4960000	4990000	TE hotspot
ctg_3	5070000	5080000	TE hotspot
ctg_3	5205000	5225000	TE hotspot
ctg_3	5305000	5310000	TE hotspot
ctg_3	5375000	5405000	TE hotspot
ctg_3	5465000	5510000	TE hotspot
ctg_3	5555000	5705000	TE hotspot
ctg_3	5795000	5810000	TE hotspot
ctg_3	5985000	6050000	TE hotspot
ctg_3	6255000	6260000	TE hotspot
ctg_3	6355000	6385000	TE hotspot
ctg_3	6420000	6435000	TE hotspot
ctg_3	6690000	6730000	TE hotspot
ctg_3	7015000	7160000	TE hotspot
ctg_3	7285000	7490000	TE hotspot
ctg_3	7615000	8165000	TE hotspot
ctg_3	8195000	8240000	TE hotspot
ctg_3	8355000	8440000	TE hotspot
ctg_3	8485000	8610000	TE hotspot
ctg_3	8835000	8905000	TE hotspot
ctg_3	8955000	9105000	TE hotspot
ctg_3	9130000	9205000	TE hotspot
ctg_3	9420000	9445000	TE hotspot
ctg_4	0	30000	TE hotspot
ctg_4	370000	435000	TE hotspot
ctg_4	685000	690000	TE hotspot
ctg_4	900000	970000	TE hotspot
ctg_4	1500000	1525000	TE hotspot
ctg_4	1680000	1760000	TE hotspot
ctg_4	2175000	2190000	TE hotspot
ctg_4	2210000	2420000	TE hotspot
ctg_4	2505000	2605000	TE hotspot
ctg_4	2640000	2645000	TE hotspot
ctg_4	2680000	2790000	TE hotspot
ctg_4	2855000	3025000	TE hotspot
ctg_4	3160000	3230000	TE hotspot
ctg_4	3435000	3535000	TE hotspot
ctg_4	3575000	3655000	TE hotspot
ctg_4	3915000	3920000	TE hotspot
ctg_4	4085000	4160000	TE hotspot
ctg_4	4325000	4340000	TE hotspot
ctg_4	4540000	4595000	TE hotspot
ctg_4	4630000	4675000	TE hotspot
ctg_4	4775000	4825000	TE hotspot
ctg_4	4870000	4895000	TE hotspot
ctg_4	4955000	4970000	TE hotspot
ctg_4	5120000	5290000	TE hotspot
ctg_4	5405000	5450000	TE hotspot
ctg_4	5520000	5715000	TE hotspot
ctg_4	5795000	5840000	TE hotspot
ctg_4	6355000	6615000	TE hotspot
ctg_4	6720000	6850000	TE hotspot
ctg_4	6925000	7040000	TE hotspot
ctg_4	7075000	7345000	TE hotspot
ctg_4	7415000	7470000	TE hotspot
ctg_4	7545000	7630000	TE hotspot
ctg_4	7660000	7745000	TE hotspot
ctg_4	7870000	7930000	TE hotspot
ctg_4	8110000	8180000	TE hotspot
ctg_4	8230000	8270000	TE hotspot
ctg_4	8335000	8370000	TE hotspot
ctg_4	8400000	8405000	TE hotspot
ctg_5	0	25000	TE hotspot
ctg_5	95000	295000	TE hotspot
ctg_5	355000	405000	TE hotspot
ctg_5	495000	525000	TE hotspot
ctg_5	610000	660000	TE hotspot
ctg_5	725000	945000	TE hotspot
ctg_5	1030000	1280000	TE hotspot
ctg_5	1335000	1380000	TE hotspot
ctg_5	1410000	1415000	TE hotspot
ctg_5	1515000	1685000	TE hotspot
ctg_5	1755000	1835000	TE hotspot
ctg_5	1910000	2070000	TE hotspot
ctg_5	2150000	2265000	TE hotspot
ctg_5	2350000	2870000	TE hotspot
ctg_5	2910000	2980000	TE hotspot
ctg_5	3015000	3205000	TE hotspot
ctg_5	3240000	3315000	TE hotspot
ctg_5	3335000	3395000	TE hotspot
ctg_5	3885000	3895000	TE hotspot
ctg_5	4140000	4150000	TE hotspot
ctg_5	4205000	4225000	TE hotspot
ctg_5	4275000	4320000	TE hotspot
ctg_5	4520000	4720000	TE hotspot
ctg_5	4785000	4985000	TE hotspot
ctg_5	5035000	5360000	TE hotspot
ctg_5	5450000	5590000	TE hotspot
ctg_5	5635000	5645000	TE hotspot
ctg_5	5680000	5710000	TE hotspot
ctg_5	5745000	5760000	TE hotspot
ctg_5	5990000	6020000	TE hotspot
ctg_5	6270000	6455000	TE hotspot
ctg_5	6510000	6575000	TE hotspot
ctg_5	6605000	6845000	TE hotspot
ctg_5	6885000	6895000	TE hotspot
ctg_5	6955000	7000000	TE hotspot
ctg_5	7045000	7050000	TE hotspot
ctg_5	7085000	7095000	TE hotspot
ctg_5	7165000	7230000	TE hotspot
ctg_5	7360000	7490000	TE hotspot
ctg_5	7580000	7650000	TE hotspot
ctg_5	7690000	7780000	TE hotspot
ctg_5	7825000	7855000	TE hotspot
ctg_5	7950000	7980000	TE hotspot
ctg_5	8020000	8070000	TE hotspot
ctg_5	8165000	8235000	TE hotspot
ctg_6	0	5000	TE hotspot
ctg_6	60000	155000	TE hotspot
ctg_6	180000	190000	TE hotspot
ctg_6	215000	425000	TE hotspot
ctg_6	470000	540000	TE hotspot
ctg_6	800000	1005000	TE hotspot
ctg_6	1075000	1135000	TE hotspot
ctg_6	1190000	1200000	TE hotspot
ctg_6	1245000	1265000	TE hotspot
ctg_6	1290000	1375000	TE hotspot
ctg_6	1405000	1460000	TE hotspot
ctg_6	1530000	1570000	TE hotspot
ctg_6	1600000	1615000	TE hotspot
ctg_6	1645000	1760000	TE hotspot
ctg_6	1825000	1950000	TE hotspot
ctg_6	2010000	2155000	TE hotspot
ctg_6	2255000	2415000	TE hotspot
ctg_6	2500000	2505000	TE hotspot
ctg_6	2605000	2620000	TE hotspot
ctg_6	2670000	2690000	TE hotspot
ctg_6	2755000	2840000	TE hotspot
ctg_6	2930000	2960000	TE hotspot
ctg_6	3070000	3085000	TE hotspot
ctg_6	3180000	3510000	TE hotspot
ctg_6	3545000	3655000	TE hotspot
ctg_6	3755000	3830000	TE hotspot
ctg_6	4305000	4315000	TE hotspot
ctg_6	4540000	4590000	TE hotspot
ctg_6	4640000	4770000	TE hotspot
ctg_6	4815000	5035000	TE hotspot
ctg_6	5060000	5090000	TE hotspot
ctg_6	5125000	5440000	TE hotspot
ctg_6	5545000	5580000	TE hotspot
ctg_6	5720000	5775000	TE hotspot
ctg_6	5805000	5870000	TE hotspot
ctg_6	5940000	6035000	TE hotspot
ctg_6	6095000	6230000	TE hotspot
ctg_6	6250000	6300000	TE hotspot
ctg_6	6340000	6355000	TE hotspot
ctg_6	6455000	6675000	TE hotspot
ctg_6	6695000	6785000	TE hotspot
ctg_6	6815000	6890000	TE hotspot
ctg_6	6915000	6930000	TE hotspot
ctg_6	6950000	7025000	TE hotspot
ctg_6	7065000	7140000	TE hotspot
ctg_6	7160000	7275000	TE hotspot
ctg_6	7330000	7340000	TE hotspot
ctg_6	7370000	7455000	TE hotspot
ctg_6	7480000	7490000	TE hotspot
ctg_6	7525000	7575000	TE hotspot
ctg_6	7680000	7770000	TE hotspot
ctg_6	7820000	7885000	TE hotspot
ctg_7	0	5000	TE hotspot
ctg_7	35000	90000	TE hotspot
ctg_7	155000	205000	TE hotspot
ctg_7	240000	1095000	TE hotspot
ctg_7	1275000	1485000	TE hotspot
ctg_7	1770000	1805000	TE hotspot
ctg_7	1975000	2045000	TE hotspot
ctg_7	2265000	2270000	TE hotspot
ctg_7	2310000	2480000	TE hotspot
ctg_7	2505000	3015000	TE hotspot
ctg_7	3080000	3320000	TE hotspot
ctg_7	3355000	3440000	TE hotspot
ctg_7	3480000	3565000	TE hotspot
ctg_7	3770000	3880000	TE hotspot
ctg_7	3955000	3995000	TE hotspot
ctg_7	4170000	4215000	TE hotspot
ctg_7	4305000	4435000	TE hotspot
ctg_7	4520000	4545000	TE hotspot
ctg_7	4635000	4695000	TE hotspot
ctg_7	4745000	4830000	TE hotspot
ctg_7	4915000	5065000	TE hotspot
ctg_7	5090000	5245000	TE hotspot
ctg_7	5385000	5450000	TE hotspot
ctg_7	5555000	5685000	TE hotspot
ctg_7	5805000	5820000	TE hotspot
ctg_7	5865000	5890000	TE hotspot
ctg_7	5965000	5980000	TE hotspot
ctg_7	6110000	6200000	TE hotspot
ctg_7	6320000	6385000	TE hotspot
ctg_7	6490000	6625000	TE hotspot
ctg_7	6925000	7020000	TE hotspot
ctg_7	7050000	7125000	TE hotspot
ctg_7	7185000	7210000	TE hotspot
ctg_8	0	40000	TE hotspot
ctg_8	90000	120000	TE hotspot
ctg_8	165000	300000	TE hotspot
ctg_8	395000	430000	TE hotspot
ctg_8	1230000	1280000	TE hotspot
ctg_8	1440000	1500000	TE hotspot
ctg_8	1650000	1655000	TE hotspot
ctg_8	1705000	1800000	TE hotspot
ctg_8	2235000	2335000	TE hotspot
ctg_8	2375000	2430000	TE hotspot
ctg_8	2690000	2865000	TE hotspot
ctg_8	3005000	3025000	TE hotspot
ctg_8	3055000	3175000	TE hotspot
ctg_8	3210000	3340000	TE hotspot
ctg_8	3380000	3575000	TE hotspot
ctg_8	3645000	3920000	TE hotspot
ctg_8	3960000	4000000	TE hotspot
ctg_8	4035000	4085000	TE hotspot
ctg_8	4120000	4190000	TE hotspot
ctg_8	4260000	4315000	TE hotspot
ctg_8	4390000	4645000	TE hotspot
ctg_8	4735000	4935000	TE hotspot
ctg_8	5015000	5080000	TE hotspot
ctg_8	5165000	5220000	TE hotspot
ctg_8	5295000	5415000	TE hotspot
ctg_8	5515000	5565000	TE hotspot
ctg_8	5635000	5655000	TE hotspot
ctg_8	5725000	5740000	TE hotspot
ctg_8	5890000	5965000	TE hotspot
ctg_8	6010000	6075000	TE hotspot
ctg_8	6165000	6805000	TE hotspot
ctg_8	6835000	6910000	TE hotspot
ctg_8	6955000	7060000	TE hotspot
ctg_8	7095000	7220000	TE hotspot
ctg_8	7270000	7285000	TE hotspot
ctg_9	0	50000	TE hotspot
ctg_9	120000	190000	TE hotspot
ctg_9	230000	275000	TE hotspot
ctg_9	625000	630000	TE hotspot
ctg_9	840000	860000	TE hotspot
ctg_9	890000	905000	TE hotspot
ctg_9	990000	1010000	TE hotspot
ctg_9	1040000	1045000	TE hotspot
ctg_9	1105000	1155000	TE hotspot
ctg_9	1205000	1330000	TE hotspot
ctg_9	1405000	1505000	TE hotspot
ctg_9	1545000	1575000	TE hotspot
ctg_9	1700000	1780000	TE hotspot
ctg_9	1865000	1895000	TE hotspot
ctg_9	1955000	1975000	TE hotspot
ctg_9	2375000	2550000	TE hotspot
ctg_9	2700000	2785000	TE hotspot
ctg_9	3070000	3095000	TE hotspot
ctg_9	3445000	3485000	TE hotspot
ctg_9	3585000	3810000	TE hotspot
ctg_9	3830000	4135000	TE hotspot
ctg_9	4180000	4235000	TE hotspot
ctg_9	4285000	4410000	TE hotspot
ctg_9	4445000	4640000	TE hotspot
ctg_9	4690000	4710000	TE hotspot
ctg_9	4825000	4880000	TE hotspot
ctg_9	4950000	5095000	TE hotspot
ctg_9	5605000	5630000	TE hotspot
ctg_9	5755000	5770000	TE hotspot
ctg_9	5885000	5985000	TE hotspot
ctg_9	6050000	6140000	TE hotspot
ctg_9	6205000	6245000	TE hotspot
ctg_9	6335000	6360000	TE hotspot
ctg_9	6410000	6485000	TE hotspot
ctg_9	6595000	6925000	TE hotspot
ctg_9	6985000	7060000	TE hotspot
ctg_9	7180000	7195000	TE hotspot
ctg_10	115000	255000	TE hotspot
ctg_10	340000	400000	TE hotspot
ctg_10	430000	460000	TE hotspot
ctg_10	635000	705000	TE hotspot
ctg_10	860000	890000	TE hotspot
ctg_10	1000000	1095000	TE hotspot
ctg_10	1225000	1230000	TE hotspot
ctg_10	1365000	1510000	TE hotspot
ctg_10	1650000	1705000	TE hotspot
ctg_10	1745000	1840000	TE hotspot
ctg_10	1930000	1985000	TE hotspot
ctg_10	2095000	2215000	TE hotspot
ctg_10	2295000	2465000	TE hotspot
ctg_10	2510000	2730000	TE hotspot
ctg_10	2815000	2840000	TE hotspot
ctg_10	3030000	3045000	TE hotspot
ctg_10	3135000	3210000	TE hotspot
ctg_10	3330000	3425000	TE hotspot
ctg_10	3545000	3630000	TE hotspot
ctg_10	3795000	3880000	TE hotspot
ctg_10	4315000	4320000	TE hotspot
ctg_10	4470000	4670000	TE hotspot
ctg_10	4700000	4710000	TE hotspot
ctg_10	4735000	5150000	TE hotspot
ctg_10	5180000	5300000	TE hotspot
ctg_10	5345000	5365000	TE hotspot
ctg_10	5395000	5445000	TE hotspot
ctg_10	5495000	5510000	TE hotspot
ctg_10	5550000	5585000	TE hotspot
ctg_10	5635000	5655000	TE hotspot
ctg_10	5710000	5855000	TE hotspot
ctg_10	5965000	5975000	TE hotspot
ctg_10	5995000	6070000	TE hotspot
ctg_10	6215000	6260000	TE hotspot
ctg_10	6280000	6355000	TE hotspot
ctg_10	6400000	6440000	TE hotspot
ctg_10	6500000	6600000	TE hotspot
ctg_10	6670000	6895000	TE hotspot
ctg_11	35000	40000	TE hotspot
ctg_11	100000	240000	TE hotspot
ctg_11	285000	425000	TE hotspot
ctg_11	465000	550000	TE hotspot
ctg_11	605000	710000	TE hotspot
ctg_11	875000	960000	TE hotspot
ctg_11	1025000	1175000	TE hotspot
ctg_11	1225000	1275000	TE hotspot
ctg_11	1340000	1345000	TE hotspot
ctg_11	1555000	1620000	TE hotspot
ctg_11	1865000	1905000	TE hotspot
ctg_11	1940000	2120000	TE hotspot
ctg_11	2270000	2545000	TE hotspot
ctg_11	2575000	2590000	TE hotspot
ctg_11	2915000	2945000	TE hotspot
ctg_11	3155000	3190000	TE hotspot
ctg_11	3290000	3860000	TE hotspot
ctg_11	3890000	3920000	TE hotspot
ctg_11	3960000	4155000	TE hotspot
ctg_11	4190000	4330000	TE hotspot
ctg_11	4360000	4390000	TE hotspot
ctg_11	4425000	4445000	TE hotspot
ctg_11	4495000	4585000	TE hotspot
ctg_11	4820000	4935000	TE hotspot
ctg_11	5065000	5125000	TE hotspot
ctg_11	5325000	5350000	TE hotspot
ctg_11	5765000	5835000	TE hotspot
ctg_11	5855000	5970000	TE hotspot
ctg_11	6030000	6050000	TE hotspot
ctg_11	6435000	6440000	TE hotspot
ctg_11	6565000	6635000	TE hotspot
ctg_11	6685000	6725000	TE hotspot
ctg_11	6965000	6970000	TE hotspot
ctg_12	50000	210000	TE hotspot
ctg_12	285000	295000	TE hotspot
ctg_12	320000	355000	TE hotspot
ctg_12	405000	475000	TE hotspot
ctg_12	520000	735000	TE hotspot
ctg_12	760000	1000000	TE hotspot
ctg_12	1040000	1110000	TE hotspot
ctg_12	1165000	1215000	TE hotspot
ctg_12	1255000	1385000	TE hotspot
ctg_12	1420000	1710000	TE hotspot
ctg_12	1765000	1875000	TE hotspot
ctg_12	1990000	1995000	TE hotspot
ctg_12	2035000	2330000	TE hotspot
ctg_12	2435000	2455000	TE hotspot
ctg_12	2525000	2630000	TE hotspot
ctg_12	2665000	2745000	TE hotspot
ctg_12	2780000	2920000	TE hotspot
ctg_12	2945000	3250000	TE hotspot
ctg_12	3275000	3325000	TE hotspot
ctg_12	3360000	3495000	TE hotspot
ctg_12	3540000	3585000	TE hotspot
ctg_12	3720000	3805000	TE hotspot
ctg_12	3945000	4015000	TE hotspot
ctg_12	4120000	4175000	TE hotspot
ctg_12	4210000	4220000	TE hotspot
ctg_12	4330000	4420000	TE hotspot
ctg_12	4470000	4525000	TE hotspot
ctg_12	4585000	4660000	TE hotspot
ctg_12	4680000	4790000	TE hotspot
ctg_12	4815000	4840000	TE hotspot
ctg_12	4910000	5060000	TE hotspot
ctg_12	5225000	5270000	TE hotspot
ctg_12	5310000	5405000	TE hotspot
ctg_12	5435000	5450000	TE hotspot
ctg_12	5480000	5520000	TE hotspot
ctg_12	5585000	5595000	TE hotspot
ctg_12	5795000	5830000	TE hotspot
ctg_12	5880000	5925000	TE hotspot
ctg_12	5975000	5985000	TE hotspot
ctg_13	0	10000	TE hotspot
ctg_13	105000	390000	TE hotspot
ctg_13	415000	630000	TE hotspot
ctg_13	665000	700000	TE hotspot
ctg_13	1000000	1185000	TE hotspot
ctg_13	1250000	1305000	TE hotspot
ctg_13	1335000	1460000	TE hotspot
ctg_13	1530000	1695000	TE hotspot
ctg_13	1760000	1860000	TE hotspot
ctg_13	1935000	1980000	TE hotspot
ctg_13	2005000	2130000	TE hotspot
ctg_13	2155000	2215000	TE hotspot
ctg_13	2250000	2375000	TE hotspot
ctg_13	2410000	2515000	TE hotspot
ctg_13	2565000	2660000	TE hotspot
ctg_13	2825000	2860000	TE hotspot
ctg_13	3110000	3290000	TE hotspot
ctg_13	3385000	3430000	TE hotspot
ctg_13	3465000	3560000	TE hotspot
ctg_13	3620000	3695000	TE hotspot
ctg_13	3815000	3925000	TE hotspot
ctg_13	4000000	4040000	TE hotspot
ctg_13	4160000	4185000	TE hotspot
ctg_13	4265000	4355000	TE hotspot
ctg_13	4415000	4515000	TE hotspot
ctg_13	4645000	4710000	TE hotspot
ctg_13	4770000	4910000	TE hotspot
ctg_13	5160000	5185000	TE hotspot
ctg_13	5220000	5240000	TE hotspot
ctg_13	5300000	5345000	TE hotspot
ctg_13	5400000	5475000	TE hotspot
ctg_13	5680000	5715000	TE hotspot
ctg_14	45000	145000	TE hotspot
ctg_14	225000	320000	TE hotspot
ctg_14	340000	615000	TE hotspot
ctg_14	675000	1120000	TE hotspot
ctg_14	1190000	1220000	TE hotspot
ctg_14	1285000	1395000	TE hotspot
ctg_14	1415000	1455000	TE hotspot
ctg_14	1480000	1620000	TE hotspot
ctg_14	1645000	1670000	TE hotspot
ctg_14	1710000	1770000	TE hotspot
ctg_14	1825000	1895000	TE hotspot
ctg_14	1955000	2130000	TE hotspot
ctg_14	2190000	2375000	TE hotspot
ctg_14	2425000	2600000	TE hotspot
ctg_14	2690000	2755000	TE hotspot
ctg_14	2790000	2860000	TE hotspot
ctg_14	2925000	3025000	TE hotspot
ctg_14	3070000	3350000	TE hotspot
ctg_14	3385000	3560000	TE hotspot
ctg_14	3615000	3835000	TE hotspot
ctg_14	3900000	3975000	TE hotspot
ctg_14	4085000	4160000	TE hotspot
ctg_14	4215000	4345000	TE hotspot
ctg_14	4385000	4390000	TE hotspot
ctg_14	4475000	4545000	TE hotspot
ctg_14	4620000	4675000	TE hotspot
ctg_14	4710000	4730000	TE hotspot
ctg_14	4925000	4935000	TE hotspot
ctg_14	4980000	5005000	TE hotspot
ctg_14	5110000	5265000	TE hotspot
ctg_15	0	10000	TE hotspot
ctg_15	55000	70000	TE hotspot
ctg_15	105000	190000	TE hotspot
ctg_15	290000	460000	TE hotspot
ctg_15	490000	545000	TE hotspot
ctg_15	610000	645000	TE hotspot
ctg_15	690000	700000	TE hotspot
ctg_15	730000	895000	TE hotspot
ctg_15	930000	1040000	TE hotspot
ctg_15	1125000	1230000	TE hotspot
ctg_15	1340000	1385000	TE hotspot
ctg_15	1580000	1600000	TE hotspot
ctg_15	1725000	1750000	TE hotspot
ctg_15	1810000	1815000	TE hotspot
ctg_15	1880000	2385000	TE hotspot
ctg_15	2430000	2645000	TE hotspot
ctg_15	2675000	2690000	TE hotspot
ctg_15	2720000	2755000	TE hotspot
ctg_15	2790000	2880000	TE hotspot
ctg_15	2910000	3035000	TE hotspot
ctg_15	3135000	3200000	TE hotspot
ctg_15	3235000	3325000	TE hotspot
ctg_15	3385000	3525000	TE hotspot
ctg_15	3720000	3775000	TE hotspot
ctg_15	4020000	4040000	TE hotspot
ctg_15	4120000	4150000	TE hotspot
ctg_15	4590000	4640000	TE hotspot
ctg_15	4765000	4795000	TE hotspot
ctg_15	4855000	4870000	TE hotspot
ctg_16	0	10000	TE hotspot
ctg_16	45000	50000	TE hotspot
ctg_16	270000	565000	TE hotspot
ctg_16	610000	730000	TE hotspot
ctg_16	780000	1030000	TE hotspot
ctg_16	1105000	1150000	TE hotspot
ctg_16	1170000	1290000	TE hotspot
ctg_16	1325000	1620000	TE hotspot
ctg_16	1655000	1930000	TE hotspot
ctg_16	1980000	2250000	TE hotspot
ctg_16	2275000	2320000	TE hotspot
ctg_16	2355000	2385000	TE hotspot
ctg_16	2430000	2735000	TE hotspot
ctg_16	2770000	2905000	TE hotspot
ctg_16	2970000	3000000	TE hotspot
ctg_16	3135000	3275000	TE hotspot
ctg_16	3350000	3355000	TE hotspot
ctg_16	3415000	3480000	TE hotspot
ctg_16	3615000	3695000	TE hotspot
ctg_16	3750000	3810000	TE hotspot
ctg_16	3910000	4050000	TE hotspot
ctg_16	4205000	4410000	TE hotspot
ctg_17	0	150000	TE hotspot
ctg_17	225000	465000	TE hotspot
ctg_17	490000	635000	TE hotspot
ctg_17	660000	675000	TE hotspot
ctg_17	700000	880000	TE hotspot
ctg_17	910000	1185000	TE hotspot
ctg_17	1270000	1415000	TE hotspot
ctg_17	1440000	1460000	TE hotspot
ctg_17	1490000	2025000	TE hotspot
ctg_1	65000	135000	TE coldspot
ctg_1	175000	225000	TE coldspot
ctg_1	315000	385000	TE coldspot
ctg_1	550000	565000	TE coldspot
ctg_1	720000	925000	TE coldspot
ctg_1	995000	1100000	TE coldspot
ctg_1	1210000	1250000	TE coldspot
ctg_1	1320000	1585000	TE coldspot
ctg_1	1670000	1740000	TE coldspot
ctg_1	1765000	2270000	TE coldspot
ctg_1	2410000	2595000	TE coldspot
ctg_1	2625000	2665000	TE coldspot
ctg_1	2715000	2725000	TE coldspot
ctg_1	2815000	2965000	TE coldspot
ctg_1	3005000	3075000	TE coldspot
ctg_1	3345000	3355000	TE coldspot
ctg_1	3375000	3385000	TE coldspot
ctg_1	3430000	3515000	TE coldspot
ctg_1	3620000	3790000	TE coldspot
ctg_1	4220000	4225000	TE coldspot
ctg_1	4385000	4445000	TE coldspot
ctg_1	4470000	4475000	TE coldspot
ctg_1	4585000	4600000	TE coldspot
ctg_1	4760000	4780000	TE coldspot
ctg_1	4905000	4960000	TE coldspot
ctg_1	5060000	5075000	TE coldspot
ctg_1	5460000	5480000	TE coldspot
ctg_1	5630000	5640000	TE coldspot
ctg_1	5875000	5910000	TE coldspot
ctg_1	6560000	6570000	TE coldspot
ctg_1	6650000	6740000	TE coldspot
ctg_1	6825000	6850000	TE coldspot
ctg_1	6970000	7035000	TE coldspot
ctg_1	7105000	7110000	TE coldspot
ctg_1	7535000	7590000	TE coldspot
ctg_1	7695000	7720000	TE coldspot
ctg_1	7765000	7775000	TE coldspot
ctg_1	8450000	8485000	TE coldspot
ctg_1	8660000	8710000	TE coldspot
ctg_1	8965000	9000000	TE coldspot
ctg_1	10045000	10070000	TE coldspot
ctg_2	30000	60000	TE coldspot
ctg_2	135000	140000	TE coldspot
ctg_2	315000	330000	TE coldspot
ctg_2	375000	390000	TE coldspot
ctg_2	575000	685000	TE coldspot
ctg_2	945000	955000	TE coldspot
ctg_2	980000	995000	TE coldspot
ctg_2	1080000	1155000	TE coldspot
ctg_2	1280000	1290000	TE coldspot
ctg_2	1470000	1515000	TE coldspot
ctg_2	1700000	1710000	TE coldspot
ctg_2	1760000	1795000	TE coldspot
ctg_2	2095000	2100000	TE coldspot
ctg_2	2195000	2220000	TE coldspot
ctg_2	2470000	2485000	TE coldspot
ctg_2	2570000	2590000	TE coldspot
ctg_2	2735000	2860000	TE coldspot
ctg_2	2920000	3025000	TE coldspot
ctg_2	3090000	3145000	TE coldspot
ctg_2	3225000	3250000	TE coldspot
ctg_2	3520000	3565000	TE coldspot
ctg_2	3645000	3680000	TE coldspot
ctg_2	3775000	3840000	TE coldspot
ctg_2	4040000	4080000	TE coldspot
ctg_2	4270000	4320000	TE coldspot
ctg_2	4380000	4385000	TE coldspot
ctg_2	4445000	4480000	TE coldspot
ctg_2	4620000	4625000	TE coldspot
ctg_2	4655000	4795000	TE coldspot
ctg_2	4835000	4870000	TE coldspot
ctg_2	4925000	5000000	TE coldspot
ctg_2	5040000	5090000	TE coldspot
ctg_2	5195000	5430000	TE coldspot
ctg_2	5475000	5770000	TE coldspot
ctg_2	5930000	5940000	TE coldspot
ctg_2	5985000	6180000	TE coldspot
ctg_2	6385000	6440000	TE coldspot
ctg_2	6575000	6600000	TE coldspot
ctg_2	6725000	6760000	TE coldspot
ctg_2	6940000	6965000	TE coldspot
ctg_2	6995000	7200000	TE coldspot
ctg_2	7235000	7275000	TE coldspot
ctg_2	7355000	7365000	TE coldspot
ctg_2	7565000	7575000	TE coldspot
ctg_2	7730000	7735000	TE coldspot
ctg_2	8020000	8050000	TE coldspot
ctg_2	8080000	8100000	TE coldspot
ctg_2	8190000	8225000	TE coldspot
ctg_2	8305000	8330000	TE coldspot
ctg_2	8520000	8680000	TE coldspot
ctg_2	8730000	8890000	TE coldspot
ctg_2	9015000	9130000	TE coldspot
ctg_2	9215000	9230000	TE coldspot
ctg_2	9395000	9435000	TE coldspot
ctg_2	9540000	9555000	TE coldspot
ctg_3	0	20000	TE coldspot
ctg_3	55000	65000	TE coldspot
ctg_3	95000	160000	TE coldspot
ctg_3	320000	325000	TE coldspot
ctg_3	580000	635000	TE coldspot
ctg_3	675000	905000	TE coldspot
ctg_3	950000	1015000	TE coldspot
ctg_3	1050000	1055000	TE coldspot
ctg_3	1125000	1160000	TE coldspot
ctg_3	1205000	1210000	TE coldspot
ctg_3	1250000	1340000	TE coldspot
ctg_3	1410000	1415000	TE coldspot
ctg_3	1465000	1495000	TE coldspot
ctg_3	1570000	1575000	TE coldspot
ctg_3	1605000	1675000	TE coldspot
ctg_3	1730000	1755000	TE coldspot
ctg_3	1790000	1795000	TE coldspot
ctg_3	1880000	1885000	TE coldspot
ctg_3	1975000	2040000	TE coldspot
ctg_3	2170000	2270000	TE coldspot
ctg_3	2320000	2330000	TE coldspot
ctg_3	2445000	2465000	TE coldspot
ctg_3	2595000	2620000	TE coldspot
ctg_3	2830000	2885000	TE coldspot
ctg_3	2935000	2945000	TE coldspot
ctg_3	2985000	3005000	TE coldspot
ctg_3	3040000	3095000	TE coldspot
ctg_3	3170000	3340000	TE coldspot
ctg_3	3375000	3430000	TE coldspot
ctg_3	3580000	3590000	TE coldspot
ctg_3	3640000	3655000	TE coldspot
ctg_3	3710000	3715000	TE coldspot
ctg_3	3810000	3835000	TE coldspot
ctg_3	3990000	3995000	TE coldspot
ctg_3	4335000	4360000	TE coldspot
ctg_3	4595000	4600000	TE coldspot
ctg_3	4875000	4945000	TE coldspot
ctg_3	5005000	5020000	TE coldspot
ctg_3	5050000	5055000	TE coldspot
ctg_3	5095000	5190000	TE coldspot
ctg_3	5240000	5290000	TE coldspot
ctg_3	5325000	5360000	TE coldspot
ctg_3	5420000	5450000	TE coldspot
ctg_3	5525000	5540000	TE coldspot
ctg_3	5720000	5735000	TE coldspot
ctg_3	5760000	5785000	TE coldspot
ctg_3	5825000	5970000	TE coldspot
ctg_3	6060000	6240000	TE coldspot
ctg_3	6275000	6340000	TE coldspot
ctg_3	6400000	6405000	TE coldspot
ctg_3	6450000	6565000	TE coldspot
ctg_3	6585000	6675000	TE coldspot
ctg_3	6740000	7005000	TE coldspot
ctg_3	7175000	7270000	TE coldspot
ctg_3	7505000	7600000	TE coldspot
ctg_3	8255000	8340000	TE coldspot
ctg_3	8455000	8475000	TE coldspot
ctg_3	8625000	8820000	TE coldspot
ctg_3	8920000	8940000	TE coldspot
ctg_3	9220000	9405000	TE coldspot
ctg_4	45000	225000	TE coldspot
ctg_4	260000	355000	TE coldspot
ctg_4	450000	670000	TE coldspot
ctg_4	700000	885000	TE coldspot
ctg_4	985000	1485000	TE coldspot
ctg_4	1540000	1665000	TE coldspot
ctg_4	1775000	2160000	TE coldspot
ctg_4	2435000	2490000	TE coldspot
ctg_4	2620000	2625000	TE coldspot
ctg_4	2660000	2665000	TE coldspot
ctg_4	2805000	2840000	TE coldspot
ctg_4	3040000	3145000	TE coldspot
ctg_4	3245000	3420000	TE coldspot
ctg_4	3545000	3560000	TE coldspot
ctg_4	3670000	3900000	TE coldspot
ctg_4	3930000	4070000	TE coldspot
ctg_4	4175000	4310000	TE coldspot
ctg_4	4355000	4525000	TE coldspot
ctg_4	4610000	4615000	TE coldspot
ctg_4	4690000	4760000	TE coldspot
ctg_4	4840000	4855000	TE coldspot
ctg_4	4910000	4940000	TE coldspot
ctg_4	4985000	5105000	TE coldspot
ctg_4	5305000	5390000	TE coldspot
ctg_4	5465000	5505000	TE coldspot
ctg_4	5725000	5780000	TE coldspot
ctg_4	5855000	6040000	TE coldspot
ctg_4	6070000	6275000	TE coldspot
ctg_4	6305000	6340000	TE coldspot
ctg_4	6630000	6705000	TE coldspot
ctg_4	6865000	6910000	TE coldspot
ctg_4	7050000	7065000	TE coldspot
ctg_4	7360000	7400000	TE coldspot
ctg_4	7485000	7495000	TE coldspot
ctg_4	7520000	7530000	TE coldspot
ctg_4	7760000	7855000	TE coldspot
ctg_4	7945000	7975000	TE coldspot
ctg_4	7995000	8095000	TE coldspot
ctg_4	8195000	8215000	TE coldspot
ctg_4	8285000	8320000	TE coldspot
ctg_4	8420000	8475000	TE coldspot
ctg_4	8495000	8515768	TE coldspot
ctg_5	40000	80000	TE coldspot
ctg_5	310000	340000	TE coldspot
ctg_5	420000	480000	TE coldspot
ctg_5	540000	595000	TE coldspot
ctg_5	675000	710000	TE coldspot
ctg_5	960000	1015000	TE coldspot
ctg_5	1295000	1325000	TE coldspot
ctg_5	1390000	1395000	TE coldspot
ctg_5	1430000	1500000	TE coldspot
ctg_5	1700000	1740000	TE coldspot
ctg_5	1850000	1895000	TE coldspot
ctg_5	2085000	2135000	TE coldspot
ctg_5	2280000	2335000	TE coldspot
ctg_5	2885000	2895000	TE coldspot
ctg_5	2995000	3000000	TE coldspot
ctg_5	3220000	3225000	TE coldspot
ctg_5	3410000	3870000	TE coldspot
ctg_5	3905000	4125000	TE coldspot
ctg_5	4165000	4190000	TE coldspot
ctg_5	4230000	4260000	TE coldspot
ctg_5	4335000	4370000	TE coldspot
ctg_5	4400000	4505000	TE coldspot
ctg_5	4735000	4770000	TE coldspot
ctg_5	5375000	5380000	TE coldspot
ctg_5	5405000	5440000	TE coldspot
ctg_5	5605000	5620000	TE coldspot
ctg_5	5725000	5730000	TE coldspot
ctg_5	5775000	5975000	TE coldspot
ctg_5	6035000	6180000	TE coldspot
ctg_5	6200000	6245000	TE coldspot
ctg_5	6470000	6475000	TE coldspot
ctg_5	6860000	6870000	TE coldspot
ctg_5	6910000	6940000	TE coldspot
ctg_5	7015000	7030000	TE coldspot
ctg_5	7065000	7070000	TE coldspot
ctg_5	7110000	7115000	TE coldspot
ctg_5	7140000	7150000	TE coldspot
ctg_5	7245000	7250000	TE coldspot
ctg_5	7275000	7345000	TE coldspot
ctg_5	7500000	7565000	TE coldspot
ctg_5	7665000	7675000	TE coldspot
ctg_5	7795000	7810000	TE coldspot
ctg_5	7870000	7940000	TE coldspot
ctg_5	7995000	8005000	TE coldspot
ctg_5	8080000	8150000	TE coldspot
ctg_6	20000	45000	TE coldspot
ctg_6	440000	455000	TE coldspot
ctg_6	555000	665000	TE coldspot
ctg_6	685000	785000	TE coldspot
ctg_6	1020000	1060000	TE coldspot
ctg_6	1145000	1175000	TE coldspot
ctg_6	1215000	1230000	TE coldspot
ctg_6	1475000	1515000	TE coldspot
ctg_6	1800000	1815000	TE coldspot
ctg_6	1965000	1995000	TE coldspot
ctg_6	2170000	2240000	TE coldspot
ctg_6	2430000	2485000	TE coldspot
ctg_6	2520000	2590000	TE coldspot
ctg_6	2635000	2655000	TE coldspot
ctg_6	2705000	2740000	TE coldspot
ctg_6	2855000	2915000	TE coldspot
ctg_6	2975000	3060000	TE coldspot
ctg_6	3100000	3165000	TE coldspot
ctg_6	3525000	3530000	TE coldspot
ctg_6	3670000	3740000	TE coldspot
ctg_6	3845000	3855000	TE coldspot
ctg_6	3885000	4085000	TE coldspot
ctg_6	4110000	4290000	TE coldspot
ctg_6	4330000	4525000	TE coldspot
ctg_6	4605000	4625000	TE coldspot
ctg_6	4785000	4800000	TE coldspot
ctg_6	5105000	5110000	TE coldspot
ctg_6	5455000	5530000	TE coldspot
ctg_6	5595000	5705000	TE coldspot
ctg_6	5885000	5925000	TE coldspot
ctg_6	6045000	6080000	TE coldspot
ctg_6	6315000	6330000	TE coldspot
ctg_6	6370000	6405000	TE coldspot
ctg_6	6425000	6440000	TE coldspot
ctg_6	7040000	7050000	TE coldspot
ctg_6	7300000	7315000	TE coldspot
ctg_6	7355000	7360000	TE coldspot
ctg_6	7500000	7515000	TE coldspot
ctg_6	7590000	7605000	TE coldspot
ctg_6	7630000	7665000	TE coldspot
ctg_7	105000	140000	TE coldspot
ctg_7	220000	225000	TE coldspot
ctg_7	1110000	1205000	TE coldspot
ctg_7	1225000	1260000	TE coldspot
ctg_7	1500000	1520000	TE coldspot
ctg_7	1545000	1755000	TE coldspot
ctg_7	1820000	1910000	TE coldspot
ctg_7	1930000	1960000	TE coldspot
ctg_7	2060000	2165000	TE coldspot
ctg_7	2190000	2250000	TE coldspot
ctg_7	2285000	2295000	TE coldspot
ctg_7	3030000	3065000	TE coldspot
ctg_7	3335000	3340000	TE coldspot
ctg_7	3455000	3465000	TE coldspot
ctg_7	3580000	3590000	TE coldspot
ctg_7	3620000	3755000	TE coldspot
ctg_7	3895000	3940000	TE coldspot
ctg_7	4010000	4155000	TE coldspot
ctg_7	4230000	4240000	TE coldspot
ctg_7	4260000	4290000	TE coldspot
ctg_7	4450000	4455000	TE coldspot
ctg_7	4480000	4505000	TE coldspot
ctg_7	4560000	4620000	TE coldspot
ctg_7	4710000	4735000	TE coldspot
ctg_7	4840000	4875000	TE coldspot
ctg_7	5260000	5370000	TE coldspot
ctg_7	5465000	5540000	TE coldspot
ctg_7	5700000	5750000	TE coldspot
ctg_7	5775000	5790000	TE coldspot
ctg_7	5830000	5850000	TE coldspot
ctg_7	5905000	5955000	TE coldspot
ctg_7	5995000	6040000	TE coldspot
ctg_7	6065000	6095000	TE coldspot
ctg_7	6215000	6230000	TE coldspot
ctg_7	6250000	6305000	TE coldspot
ctg_7	6400000	6475000	TE coldspot
ctg_7	6640000	6790000	TE coldspot
ctg_7	6820000	6910000	TE coldspot
ctg_7	7030000	7035000	TE coldspot
ctg_7	7140000	7170000	TE coldspot
ctg_7	7225000	7310000	TE coldspot
ctg_8	55000	75000	TE coldspot
ctg_8	135000	150000	TE coldspot
ctg_8	315000	380000	TE coldspot
ctg_8	445000	940000	TE coldspot
ctg_8	965000	980000	TE coldspot
ctg_8	1000000	1215000	TE coldspot
ctg_8	1290000	1425000	TE coldspot
ctg_8	1515000	1635000	TE coldspot
ctg_8	1670000	1690000	TE coldspot
ctg_8	1815000	2220000	TE coldspot
ctg_8	2350000	2360000	TE coldspot
ctg_8	2445000	2675000	TE coldspot
ctg_8	2880000	2990000	TE coldspot
ctg_8	3190000	3195000	TE coldspot
ctg_8	3355000	3365000	TE coldspot
ctg_8	3590000	3630000	TE coldspot
ctg_8	3935000	3945000	TE coldspot
ctg_8	4015000	4025000	TE coldspot
ctg_8	4100000	4105000	TE coldspot
ctg_8	4205000	4245000	TE coldspot
ctg_8	4330000	4380000	TE coldspot
ctg_8	4660000	4705000	TE coldspot
ctg_8	4950000	5000000	TE coldspot
ctg_8	5095000	5150000	TE coldspot
ctg_8	5235000	5280000	TE coldspot
ctg_8	5430000	5455000	TE coldspot
ctg_8	5480000	5485000	TE coldspot
ctg_8	5580000	5585000	TE coldspot
ctg_8	5615000	5620000	TE coldspot
ctg_8	5670000	5700000	TE coldspot
ctg_8	5785000	5825000	TE coldspot
ctg_8	5855000	5875000	TE coldspot
ctg_8	5980000	5995000	TE coldspot
ctg_8	6090000	6150000	TE coldspot
ctg_8	6925000	6940000	TE coldspot
ctg_8	7075000	7080000	TE coldspot
ctg_8	7235000	7255000	TE coldspot
ctg_9	65000	105000	TE coldspot
ctg_9	205000	215000	TE coldspot
ctg_9	285000	610000	TE coldspot
ctg_9	645000	795000	TE coldspot
ctg_9	815000	825000	TE coldspot
ctg_9	875000	880000	TE coldspot
ctg_9	915000	975000	TE coldspot
ctg_9	1060000	1090000	TE coldspot
ctg_9	1170000	1190000	TE coldspot
ctg_9	1340000	1390000	TE coldspot
ctg_9	1520000	1530000	TE coldspot
ctg_9	1590000	1635000	TE coldspot
ctg_9	1665000	1685000	TE coldspot
ctg_9	1795000	1850000	TE coldspot
ctg_9	1910000	1940000	TE coldspot
ctg_9	1990000	2360000	TE coldspot
ctg_9	2565000	2685000	TE coldspot
ctg_9	2800000	2870000	TE coldspot
ctg_9	2900000	3055000	TE coldspot
ctg_9	3110000	3410000	TE coldspot
ctg_9	3500000	3570000	TE coldspot
ctg_9	4150000	4165000	TE coldspot
ctg_9	4245000	4270000	TE coldspot
ctg_9	4425000	4430000	TE coldspot
ctg_9	4655000	4680000	TE coldspot
ctg_9	4725000	4810000	TE coldspot
ctg_9	4895000	4935000	TE coldspot
ctg_9	5110000	5195000	TE coldspot
ctg_9	5220000	5470000	TE coldspot
ctg_9	5490000	5590000	TE coldspot
ctg_9	5645000	5740000	TE coldspot
ctg_9	5785000	5870000	TE coldspot
ctg_9	6000000	6040000	TE coldspot
ctg_9	6155000	6190000	TE coldspot
ctg_9	6260000	6270000	TE coldspot
ctg_9	6295000	6320000	TE coldspot
ctg_9	6375000	6395000	TE coldspot
ctg_9	6500000	6515000	TE coldspot
ctg_9	6555000	6585000	TE coldspot
ctg_9	6940000	6970000	TE coldspot
ctg_9	7075000	7110000	TE coldspot
ctg_9	7130000	7170000	TE coldspot
ctg_9	7210000	7265000	TE coldspot
ctg_10	0	100000	TE coldspot
ctg_10	270000	330000	TE coldspot
ctg_10	475000	620000	TE coldspot
ctg_10	720000	845000	TE coldspot
ctg_10	905000	990000	TE coldspot
ctg_10	1110000	1210000	TE coldspot
ctg_10	1245000	1350000	TE coldspot
ctg_10	1525000	1635000	TE coldspot
ctg_10	1720000	1730000	TE coldspot
ctg_10	1855000	1915000	TE coldspot
ctg_10	2000000	2080000	TE coldspot
ctg_10	2230000	2260000	TE coldspot
ctg_10	2480000	2495000	TE coldspot
ctg_10	2745000	2800000	TE coldspot
ctg_10	2850000	3015000	TE coldspot
ctg_10	3060000	3120000	TE coldspot
ctg_10	3220000	3315000	TE coldspot
ctg_10	3440000	3530000	TE coldspot
ctg_10	3670000	3785000	TE coldspot
ctg_10	3895000	4075000	TE coldspot
ctg_10	4105000	4165000	TE coldspot
ctg_10	4190000	4300000	TE coldspot
ctg_10	4335000	4455000	TE coldspot
ctg_10	5315000	5330000	TE coldspot
ctg_10	5375000	5380000	TE coldspot
ctg_10	5460000	5485000	TE coldspot
ctg_10	5525000	5535000	TE coldspot
ctg_10	5600000	5620000	TE coldspot
ctg_10	5670000	5700000	TE coldspot
ctg_10	5870000	5950000	TE coldspot
ctg_10	6085000	6200000	TE coldspot
ctg_10	6370000	6385000	TE coldspot
ctg_10	6455000	6485000	TE coldspot
ctg_10	6615000	6655000	TE coldspot
ctg_10	6910000	6950000	TE coldspot
ctg_10	6980000	6990000	TE coldspot
ctg_10	7020000	7060000	TE coldspot
ctg_11	0	20000	TE coldspot
ctg_11	55000	85000	TE coldspot
ctg_11	255000	270000	TE coldspot
ctg_11	440000	450000	TE coldspot
ctg_11	565000	590000	TE coldspot
ctg_11	725000	865000	TE coldspot
ctg_11	975000	1010000	TE coldspot
ctg_11	1190000	1210000	TE coldspot
ctg_11	1290000	1325000	TE coldspot
ctg_11	1360000	1540000	TE coldspot
ctg_11	1635000	1850000	TE coldspot
ctg_11	1920000	1925000	TE coldspot
ctg_11	2135000	2200000	TE coldspot
ctg_11	2225000	2255000	TE coldspot
ctg_11	2605000	2900000	TE coldspot
ctg_11	2960000	3140000	TE coldspot
ctg_11	3205000	3275000	TE coldspot
ctg_11	3935000	3945000	TE coldspot
ctg_11	4170000	4175000	TE coldspot
ctg_11	4405000	4410000	TE coldspot
ctg_11	4460000	4480000	TE coldspot
ctg_11	4600000	4805000	TE coldspot
ctg_11	4950000	5050000	TE coldspot
ctg_11	5140000	5310000	TE coldspot
ctg_11	5365000	5575000	TE coldspot
ctg_11	5595000	5755000	TE coldspot
ctg_11	5985000	6015000	TE coldspot
ctg_11	6065000	6420000	TE coldspot
ctg_11	6455000	6550000	TE coldspot
ctg_11	6650000	6670000	TE coldspot
ctg_11	6740000	6950000	TE coldspot
ctg_11	6985000	6986825	TE coldspot
ctg_12	0	35000	TE coldspot
ctg_12	225000	270000	TE coldspot
ctg_12	370000	390000	TE coldspot
ctg_12	490000	505000	TE coldspot
ctg_12	1015000	1025000	TE coldspot
ctg_12	1120000	1150000	TE coldspot
ctg_12	1230000	1240000	TE coldspot
ctg_12	1400000	1405000	TE coldspot
ctg_12	1745000	1750000	TE coldspot
ctg_12	1885000	1920000	TE coldspot
ctg_12	1940000	1945000	TE coldspot
ctg_12	1970000	1980000	TE coldspot
ctg_12	2010000	2020000	TE coldspot
ctg_12	2340000	2420000	TE coldspot
ctg_12	2470000	2510000	TE coldspot
ctg_12	2645000	2650000	TE coldspot
ctg_12	2755000	2770000	TE coldspot
ctg_12	3340000	3345000	TE coldspot
ctg_12	3510000	3525000	TE coldspot
ctg_12	3600000	3705000	TE coldspot
ctg_12	3820000	3930000	TE coldspot
ctg_12	4030000	4105000	TE coldspot
ctg_12	4190000	4195000	TE coldspot
ctg_12	4235000	4315000	TE coldspot
ctg_12	4435000	4455000	TE coldspot
ctg_12	4540000	4570000	TE coldspot
ctg_12	4855000	4895000	TE coldspot
ctg_12	5075000	5215000	TE coldspot
ctg_12	5285000	5295000	TE coldspot
ctg_12	5415000	5420000	TE coldspot
ctg_12	5460000	5465000	TE coldspot
ctg_12	5535000	5570000	TE coldspot
ctg_12	5605000	5670000	TE coldspot
ctg_12	5700000	5715000	TE coldspot
ctg_12	5745000	5780000	TE coldspot
ctg_12	5940000	5960000	TE coldspot
ctg_13	25000	90000	TE coldspot
ctg_13	645000	650000	TE coldspot
ctg_13	715000	760000	TE coldspot
ctg_13	790000	985000	TE coldspot
ctg_13	1200000	1240000	TE coldspot
ctg_13	1315000	1320000	TE coldspot
ctg_13	1475000	1515000	TE coldspot
ctg_13	1710000	1750000	TE coldspot
ctg_13	1875000	1920000	TE coldspot
ctg_13	2230000	2235000	TE coldspot
ctg_13	2390000	2395000	TE coldspot
ctg_13	2530000	2550000	TE coldspot
ctg_13	2675000	2810000	TE coldspot
ctg_13	2875000	3095000	TE coldspot
ctg_13	3305000	3330000	TE coldspot
ctg_13	3355000	3370000	TE coldspot
ctg_13	3445000	3450000	TE coldspot
ctg_13	3575000	3605000	TE coldspot
ctg_13	3705000	3800000	TE coldspot
ctg_13	3940000	3985000	TE coldspot
ctg_13	4055000	4070000	TE coldspot
ctg_13	4095000	4145000	TE coldspot
ctg_13	4195000	4200000	TE coldspot
ctg_13	4225000	4250000	TE coldspot
ctg_13	4370000	4400000	TE coldspot
ctg_13	4525000	4575000	TE coldspot
ctg_13	4605000	4630000	TE coldspot
ctg_13	4725000	4755000	TE coldspot
ctg_13	4925000	5020000	TE coldspot
ctg_13	5050000	5145000	TE coldspot
ctg_13	5200000	5205000	TE coldspot
ctg_13	5255000	5285000	TE coldspot
ctg_13	5360000	5385000	TE coldspot
ctg_13	5490000	5665000	TE coldspot
ctg_13	5730000	5765000	TE coldspot
ctg_14	5000	30000	TE coldspot
ctg_14	160000	210000	TE coldspot
ctg_14	630000	660000	TE coldspot
ctg_14	1135000	1175000	TE coldspot
ctg_14	1235000	1275000	TE coldspot
ctg_14	1685000	1695000	TE coldspot
ctg_14	1785000	1810000	TE coldspot
ctg_14	1910000	1920000	TE coldspot
ctg_14	2145000	2180000	TE coldspot
ctg_14	2390000	2410000	TE coldspot
ctg_14	2615000	2680000	TE coldspot
ctg_14	2770000	2775000	TE coldspot
ctg_14	2875000	2910000	TE coldspot
ctg_14	3040000	3055000	TE coldspot
ctg_14	3365000	3370000	TE coldspot
ctg_14	3575000	3600000	TE coldspot
ctg_14	3845000	3855000	TE coldspot
ctg_14	3985000	4070000	TE coldspot
ctg_14	4175000	4200000	TE coldspot
ctg_14	4360000	4375000	TE coldspot
ctg_14	4405000	4450000	TE coldspot
ctg_14	4555000	4605000	TE coldspot
ctg_14	4690000	4695000	TE coldspot
ctg_14	4745000	4830000	TE coldspot
ctg_14	4860000	4910000	TE coldspot
ctg_14	4950000	4965000	TE coldspot
ctg_14	5020000	5035000	TE coldspot
ctg_14	5065000	5095000	TE coldspot
ctg_14	5280000	5358410	TE coldspot
ctg_15	25000	40000	TE coldspot
ctg_15	85000	90000	TE coldspot
ctg_15	205000	275000	TE coldspot
ctg_15	470000	475000	TE coldspot
ctg_15	560000	595000	TE coldspot
ctg_15	655000	675000	TE coldspot
ctg_15	910000	915000	TE coldspot
ctg_15	1055000	1110000	TE coldspot
ctg_15	1245000	1325000	TE coldspot
ctg_15	1400000	1565000	TE coldspot
ctg_15	1615000	1635000	TE coldspot
ctg_15	1665000	1710000	TE coldspot
ctg_15	1830000	1865000	TE coldspot
ctg_15	2400000	2415000	TE coldspot
ctg_15	2770000	2775000	TE coldspot
ctg_15	3050000	3120000	TE coldspot
ctg_15	3215000	3220000	TE coldspot
ctg_15	3340000	3370000	TE coldspot
ctg_15	3540000	3705000	TE coldspot
ctg_15	3790000	4005000	TE coldspot
ctg_15	4055000	4105000	TE coldspot
ctg_15	4165000	4575000	TE coldspot
ctg_15	4655000	4750000	TE coldspot
ctg_15	4810000	4840000	TE coldspot
ctg_16	25000	30000	TE coldspot
ctg_16	65000	100000	TE coldspot
ctg_16	120000	185000	TE coldspot
ctg_16	210000	255000	TE coldspot
ctg_16	580000	595000	TE coldspot
ctg_16	745000	765000	TE coldspot
ctg_16	1045000	1090000	TE coldspot
ctg_16	1305000	1310000	TE coldspot
ctg_16	1635000	1640000	TE coldspot
ctg_16	1945000	1965000	TE coldspot
ctg_16	2335000	2340000	TE coldspot
ctg_16	2400000	2415000	TE coldspot
ctg_16	2750000	2755000	TE coldspot
ctg_16	2920000	2955000	TE coldspot
ctg_16	3015000	3120000	TE coldspot
ctg_16	3290000	3335000	TE coldspot
ctg_16	3370000	3400000	TE coldspot
ctg_16	3495000	3555000	TE coldspot
ctg_16	3585000	3600000	TE coldspot
ctg_16	3710000	3735000	TE coldspot
ctg_16	3845000	3895000	TE coldspot
ctg_16	4065000	4150000	TE coldspot
ctg_16	4175000	4190000	TE coldspot
ctg_17	165000	210000	TE coldspot
ctg_17	1200000	1255000	TE coldspot
