# Supplementary material for: High-quality assembly of the Chinese white truffle genome and recalibrated divergence time estimate provide insight into the evolutionary dynamics of Tuberaceae
Source: HighWire-hosted journal article supplement (doi:10.1101/gr.280368.124), 2025-08-21
Supplement: Supplemental_Table_S4.xlsx [file Supplemental_Table_S4.xlsx]

## Sheet: Foglio1
Supplemental Table S4: Correlation between contig/scaffold N50 values and genome size/repetitive content of Pezizales genomes included in comparative genomic analyses. rho = Spearman's rank correlation coefficient
Variable	rho	p
Assembly size	0.18	0.95
total TE content	0.14	0.64
Gypsy content	0.22	0.48
Non-Gypsy LTR content	-0.36	0.23
DNA content	0.31	0.30
RC content	-0.07	0.83
LINE content	0.37	0.21
