# Supplementary material for: High-quality assembly of the Chinese white truffle genome and recalibrated divergence time estimate provide insight into the evolutionary dynamics of Tuberaceae
Source: HighWire-hosted journal article supplement (doi:10.1101/gr.280368.124), 2025-08-21
Supplement: Supplemental_Table_S5.xlsx [file Supplemental_Table_S5.xlsx]

## Sheet: Foglio1
Supplemental Table S5: Transposable element content across 13 Pezizales genomes. Pcon = Pyronema confluens; Gesc = Gyromitra esculenta; Mimp = Morchella importuna; Msex = Morchella sextelata; Vcon = Verpa coninca; Cven = Choiromyces venosus; Tpan = Tuber panzhihuanense; Tbor = Tuber borchii; Tmag = Tuber magnatum; Taes = Tuber aestivum; Tbru = Tuber brumale; Tmela = Tuber melanosporum; Tind = Tub…
	Genome coverage (%)									Presence					Genome coverage (%)
Specie	Unknown	RC	SINE	LINE	DNA	Gypsy	PLE	Non-Gypsy LTR	Total	Prometheus	Tmt1	Skipper	TCN-Like	Others	Promteheus	Tmt1	Skipper	TCN-Like	Others
Pcon	4.64897751079867	0.00522727617093285	0.0168692097921615	2.21967737051577	0.0529584044346172	7.07869143546681	0	0.57114638704064	14.5935475942196	YES	YES	NO	NO	YES	/	/	/	/	/
Gesc	5.41836895942835	0.39411090939328	0.0249849008863971	1.85517347637911	0.0490080274609708	9.42629058276241	0	0.1795142	17.3474510762074	YES	NO	NO		YES	/	/	/	/	/
Mimp	5.91111569892622	0	0.00402535613062033	0.560551458866623	0.895514105819858	5.75227907318865	0	0.85660363894943	13.9800893318814	YES	NO	YES	NO	YES	/	/	/	/	/
Msex	3.48567555691628	0.796293240043086	0.00787387067217823	2.31547426340995	0.332789573307705	8.47569909396539	0.159280675432499	0.992792794911779	16.5658790686589	YES	NO	NO	NO	YES	/	/	/	/	/
Vcon	5.91934381678418	0.221738571825699	0.00400140657901118	0.638517697940036	0.194084699339781	0.641635762704241	0	0.423195439794029	8.04251739496698	YES	YES	YES	NO	YES	/	/	/	/	/
Cven	13.5875665617511	8.03010064669876	0.031136580890172	5.56668160669264	8.8067212232967	16.877557369307	0	4.985502721295	57.8852667099314	YES	YES	YES	YES	YES	7.02032744	6.81243603	1.18407951	1.96373654	0.16048395
Taes	16.212383775501	0.643391311140633	0.0818873604137362	7.69451383499827	5.24347075513357	19.3499308881485	0	3.0764263028095	52.3020042281452	YES	YES	YES	YES	YES	8.89446432	3.53633564	0.11592659	2.36989025	2.55152795
Tbor	22.2847502803236	0.508888239565959	0	8.38829200718263	7.24310491024062	9.53569858259906	0	3.44992667746554	51.4106606973774	YES	YES	YES	YES	YES	2.86136770	3.13677956	0.64411179	1.90660095	/
Tbru	9.72695083790967	0.0232420118745127	0	17.5540945503942	3.82433845502423	25.310730591017	0.0110974846508371	6.9735047772703	63.4239587081407	YES	YES	YES	NO	YES	18.20057188	5.69894423	0.01504766	/	0.07590505
Tind	13.3568238996434	0.0713211524450582	0.0166858879733718	11.5942938335729	5.04175730121179	13.2639215960017	0	5.5742323407769	48.9190360116251	YES	YES	YES	YES	YES	7.12273922	4.04736635	0.11666275	1.53296675	0.07279453
Tmag	5.7523710931036	0.37784964603673	0.00259776040788324	1.92484138631538	5.12700695989707	45.552552482969	0	1.5724158678489	60.3096351965786	YES	YES	YES	YES	YES	21.70283008	5.02928645	0.07688655	13.80471096	1.67161266
Tmela	9.28508769353267	0.188625135740964	0.0422151375803227	4.11567498336197	6.54718959440478	31.7817206709519	0	6.4750646644893	58.4355778800619	YES	YES	YES	YES	YES	7.39715881	9.26717751	0.17176101	10.35852358	0.12614520
Tpan	7.55739595072218	0.688124651513089	0.00409323081030136	18.0622371831237	9.90473867542415	26.5688807960447	0	1.5541435739369	64.339614061575	YES	YES	YES	YES	NO	17.84922662	8.52974254	0.14226106	1.90853101	/
