# Supplementary material for: High-quality assembly of the Chinese white truffle genome and recalibrated divergence time estimate provide insight into the evolutionary dynamics of Tuberaceae
Source: HighWire-hosted journal article supplement (doi:10.1101/gr.280368.124), 2025-08-21
Supplement: Supplemental_Table_S6.xlsx [file Supplemental_Table_S6.xlsx]

## Sheet: Foglio1
Supplemental Table S6: Spearman's rank correlation coefficients (rho) between assembly size as a proxy of genome size and the main transposon groups present in analyzed Pezizales genomes. Correlation tests were performed on both raw dataset and after correcting them for shared evolutionary history using phylogenetic independent contrasts (PIC). λ Phylogenetic signal = Phylogenetic signal detected…
	Total	Gypsy	LTR	LINE	DNA	RC
PIC corrected rho	0.82**	0.83**	0.16	0.004	0.10	-0.03
Uncorrected rho	0.94**	0.86**	0.68*	0.58*	0.72**	0.18
λ Phylogenetic signal	0.96**	0.41	1*	0.34	0.97**	1
