# Supplementary material for: High-quality assembly of the Chinese white truffle genome and recalibrated divergence time estimate provide insight into the evolutionary dynamics of Tuberaceae
Source: HighWire-hosted journal article supplement (doi:10.1101/gr.280368.124), 2025-08-21
Supplement: Supplemental_Table_S7.xlsx [file Supplemental_Table_S7.xlsx]

## Sheet: Foglio1
Supplemental Table S7: Annotation statistics for V. Conica and G. esculenta. BUSCO scores were obtained using the Ascomycota odb10 as a reference gene set.
	Verpa conica	Gyromitra esculenta
RNA-seq NCBI accession	SRR12605086	SRR5491178
BUSCO scores	C:97.1%[S:96.0%,D:1.1%],F:0.8%,M:2.1%,n:1706	C:94.5%[S:93.4%,D:1.1%],F:1.7%,M:3.8%,n:1706
number of genes	10675	9317
mean gene lenght	1780	1728
mean exon lenght	399	409
mean number of exons per gene	3.8	3.6
mean intron length	86	97
mean number of introns per gene	2.8	2.6
Gene density	41.8	34.2
