# Supplementary material for: High-quality assembly of the Chinese white truffle genome and recalibrated divergence time estimate provide insight into the evolutionary dynamics of Tuberaceae
Source: HighWire-hosted journal article supplement (doi:10.1101/gr.280368.124), 2025-08-21
Supplement: Supplemental_Table_S8.xlsx [file Supplemental_Table_S8.xlsx]

## Sheet: Foglio1
Supplemental Table S8: Gene counts inferred by CAFE for ECM-induced gene families expanded in the stem branch of Tuberaceae. Internal node labels refer to Fig. 6.
FamilyID	Cven<1>	Taes<2>	Tmag<3>	Tbru<4>	Tind<5>	Tmela<6>	Tbor<7>	Tpan<8>	Gesc<9>	Mimp<10>	Msex<11>	Vcon<12>	Pcon<13>	<14>	<15>	<16>	<17>	<18>	<19>	<20>	<21>	<22>	<23>	<24>	<25>
OG0000007	0	85	-3	1	0	0	0	-2	-1	0	0	0	0	0	0	10	1	1	13	-2	-7	-1	0	0	-1
OG0000009	13	-7	48	-4	-8	89	0	-1	0	0	0	0	0	0	0	5	0	0	1	0	2	-5	0	0	0
OG0000023	-1	1	-2	1	0	-1	15	0	-3	-3	1	3	0	0	0	3	1	0	0	0	-4	14	0	0	0
OG0000028	-2	-1	0	0	2	0	18	-3	0	0	0	0	0	0	0	5	2	0	0	1	0	2	0	-2	-1
OG0000075	4	0	0	0	0	0	6	-6	1	0	-1	-1	-2	0	0	3	0	0	0	-1	0	0	0	0	0
OG0000080	-1	2	-2	3	4	-2	1	-2	0	1	0	0	0	0	0	1	1	0	0	4	0	0	0	0	0
OG0000135	1	-3	3	0	-2	4	-3	0	-1	1	0	-1	1	0	0	2	0	0	0	1	0	0	-1	0	0
OG0000138	1	-2	4	0	0	0	0	-1	0	0	0	0	0	0	0	3	0	0	0	1	0	-1	0	0	0
OG0000166	7	0	0	0	0	0	17	-2	0	0	0	0	0	0	0	1	0	-1	0	0	0	1	-1	0	0
OG0000239	0	0	0	0	0	0	0	0	0	0	0	0	-1	0	0	1	0	0	0	0	-1	-1	0	0	0
OG0000240	-2	0	2	-1	0	-1	0	0	0	-1	0	1	0	0	0	1	0	0	1	-1	0	0	0	0	-1
OG0000381	1	0	0	0	0	0	0	0	0	1	0	0	0	0	0	1	0	0	0	0	0	0	0	0	0
OG0000424	0	1	0	0	0	0	0	0	0	0	0	0	0	0	0	1	0	0	0	0	0	0	0	0	0
OG0000432	-1	0	0	2	0	0	1	-1	0	0	0	0	0	0	0	1	0	0	0	0	0	0	0	0	0
OG0000519	0	0	0	0	0	0	0	0	2	0	0	0	0	0	0	1	0	0	0	-1	0	0	0	0	0
OG0000536	-1	0	-1	0	0	0	3	0	0	0	0	0	0	0	0	1	0	0	0	0	-1	0	0	0	0
OG0000669	0	0	0	0	0	0	0	0	0	0	0	0	0	0	0	1	0	0	0	-1	0	0	0	0	0
OG0001310	0	0	0	0	0	0	0	0	0	0	0	0	0	0	0	1	0	-1	0	0	0	1	-1	0	0
