# Supplementary material for: High-quality assembly of the Chinese white truffle genome and recalibrated divergence time estimate provide insight into the evolutionary dynamics of Tuberaceae
Source: HighWire-hosted journal article supplement (doi:10.1101/gr.280368.124), 2025-08-21
Supplement: Supplemental_Table_S9.xlsx [file Supplemental_Table_S9.xlsx]

## Sheet: Foglio1
Supplemental Table S9: Accession of Ascomycota species included in phylogenetic inference and divergence time estimations.
Species	Subphylum	Class	Accession
Cucurbitaria berberidis	Pezizomycotina	Dothideomycetes	GCF_010015615.1
Delitschia confertaspora	Pezizomycotina	Dothideomycetes	GCF_010015615.1
Microthyrium microscopicum	Pezizomycotina	Dothideomycetes	GCA_010405405.1
Venturia effusa	Pezizomycotina	Dothideomycetes	GCA_007735645.1
Aspergillus wentii	Pezizomycotina	Eurotiomycetes	GCF_001890725.1
Aspergillus niger	Pezizomycotina	Eurotiomycetes	GCF_000002855.4
Parmelia sp.	Pezizomycotina	Lecanoromycetes	GCA_018257885.1
Xanthoparmelia taractica	Pezizomycotina	Lecanoromycetes	GCA_033085395.1
Colletotrichum gloeosporioides	Pezizomycotina	Sordariomycetes	GCF_011800055.1
Colletotrichum destructivum	Pezizomycotina	Sordariomycetes	GCF_034447905.1
Ophiocordyceps australis	Pezizomycotina	Sordariomycetes	GCA_002591415.1
Ophiocordyceps sinensis	Pezizomycotina	Sordariomycetes	GCA_002077885.1
Botrytis cinerea	Pezizomycotina	Leotiomycetes	GCF_000143535.2
Cyclaneusma minus	Pezizomycotina	Leotiomycetes	GCA_037179335.1
Arthrobotrys flagrans	Pezizomycotina	Orbiliomycetes	GCA_004000055.1
Arthrobotrys iridis	Pezizomycotina	Orbiliomycetes	GCA_036971165.1
Ascobolus immersus	Pezizomycotina	Pezizomycetes	GCA_003788565.2
Pyronema confluens	Pezizomycotina	Pezizomycetes	GCA_000981605.1
Gyromitra esculenta	Pezizomycotina	Pezizomycetes	GCA_038503075.1
Morchella importuna	Pezizomycotina	Pezizomycetes	GCF_003444635.1
Morchella sextelata	Pezizomycotina	Pezizomycetes	GCF_020137385.1
Verpa conica	Pezizomycotina	Pezizomycetes	GCA_033030425.1
Choiromyces venosus	Pezizomycotina	Pezizomycetes	GCA_003788595.2
Tuber borchii	Pezizomycotina	Pezizomycetes	GCA_003070745.1
Tuber magnatum	Pezizomycotina	Pezizomycetes	GCA_003182015.1
Tuber aestivum	Pezizomycotina	Pezizomycetes	GCA_900010015.1
Tuber brumale	Pezizomycotina	Pezizomycetes	GCA_014065205.1
Tuber melanospurm	Pezizomycotina	Pezizomycetes	GCF_000151645.1
Tuber indicum	Pezizomycotina	Pezizomycetes	GCA_014065215.1
Saccharomyces cerevisiae	Saccharomycotina	Saccharomycetes	GCA_000146045.2
Schizosaccharomyces osmophilus	Taphrinomycotina	Schizosaccharomycetes	GCF_027921745.1
