# Supplementary material for: High-quality assembly of the Chinese white truffle genome and recalibrated divergence time estimate provide insight into the evolutionary dynamics of Tuberaceae
Source: HighWire-hosted journal article supplement (doi:10.1101/gr.280368.124), 2025-08-21
Supplement: Supplemental_Table_S10.xlsx [file Supplemental_Table_S10.xlsx]

## Sheet: Foglio1
Supplemetal Table S10: Details about calibration points and priors used for divergence time estimation. Detailed justification on the fossils used as calibration points can be found in supplementary data Supplementary Material and Methods. The "Node number" column reffer to Fig. 3.
Taxon 1	vs	Taxon 2	min**	max*	mean	statistics	Notes
Schizosaccharomyces osmophilus		Tuber sp.	423	749	543	normal	the mean is the posterior from 21 studies with boundaries cut at a min of 423.0 (the oldest crown Ascomycetes) and a max of 749.0 (the oldest accepted CI) for the Asco/Bas split.
Saccharomyces cerevisiae		Tuber sp.	423	670.2	-	flat
Ascobolus immersus		Tuber sp.	11.6	458.8	-	flat
Arthrobotrys flagrans		Arthrobotrys iridis	100.5	458.8	-	flat
Botrytis cinerea		Cyclaneusma minus	65.5	723.0	-	flat
Ophiocordyceps australis		Ophiocordyceps sinensis	99	251	-	flat
Colletotrichum gloeosporioides		Colletotrichum destructivum	61.6	251	-	flat
Parmelia sp.		Xanthoparmelia taractica	15	367.0	-	flat
Aspergillus wentii		Aspergillus niger	35	367.0	-	flat
Microthyrium microscopicum		Venturia effusa	99.6	337.9	-	flat
Cucurbitaria berberidis		Delitschia confertaspora	93	337.9	-	flat
* nodes used to define soft maxium for the calibration
Taxon 1	vs	Taxon 2	n. studies	median (Ma)	CI 95%
Saccharomycotina + Pezizomycetes		Schizosaccharomycetes	21	642	583.2 - 749.0
Saccharomycotina		Pezizomycotina	21	534	437.8 - 670.2
Pezizomycetes		Orbiliomycetes	11	419	356.7 - 458.8
Pezizomycetes		Leotiomycetes	5	408	387.7 - 723.0
Ophiocordyceps		Colletotrichum	1	251
Lecanoromycetes		Sordariomycetes	15	321	233.8 - 367.0
Eurotiomycetes		Dothideomycetes	15	321	233.8 - 367.0
Pleosporales		Microthyriales	2	308	278.5 - 337.9
** fossils used to define the minimum of the calibration
fossil		Age (Ma)
LL03/02 NMW 2018.17G.10		423.0 - 425.6
Fusiformisporites acutus		11.6 - 23.3
Palaeoanellus dimorphus		105.5 - 113
Ovularites barbouri		65.5 - 145.5
Paleoophiocordyceps coccophagus		99 - 105
Colletotrichum sp.		61.6 - 67.8
Parmelia sp.		15 - 45
Aspergillus sp.		35 - 55
Asterothyrites dictyozamiticola		99.6 - 145.5
Palaeocurvularia variabilis		93 - 95
